1 **Unraveling Phylogenetic Relationships,**  
2 **Reticulate Evolution, and Genome Composition**  
3 **of Polyploid Plant Complexes by Rad-Seq and**  
4 **Hyb-Seq**

5

6 **Karbstein, Kevin<sup>1,2,\*</sup>, Tomasello, Salvatore<sup>1</sup>, Hodač, Ladislav<sup>1</sup>, Wagner, Natascha<sup>1</sup>,**  
7 **Marinček, Pia<sup>1</sup>, Barke, Birthe Hilkka<sup>1</sup>, Pätzold, Claudia<sup>1,3</sup>, & Hörandl, Elvira<sup>1</sup>**

8

9 <sup>1</sup> *University of Göttingen, Albrecht-von-Haller Institute for Plant Sciences, Department*  
10 *of Systematics, Biodiversity and Evolution of Plants (with Herbarium), Göttingen,*  
11 *Germany*

12 <sup>2</sup> *University of Göttingen, Georg-August University School of Science (GAUSS),*  
13 *Göttingen, Germany*

14 <sup>3</sup> *Senckenberg Research Institute, Department of Botany and Molecular Evolution,*  
15 *Frankfurt (Main), Germany*

16

17 \* **corresponding author: email: [kevin.karbstein@uni-goettingen.de](mailto:kevin.karbstein@uni-goettingen.de)**

18 **Author contribution**

19 K.K., S.T., and E.H. designed research; K.K., L.H., and E.H. collected plant materials; K.K.,  
20 S.T., P.M., B.B.H., and C.P. performed lab work; K.K., S.T., and N.W. analyzed data; K.K.  
21 wrote the paper with contributions of all authors.

22

23 **Competing interests**

24 There is no conflict of interest.

25

26 **Abstract**

27 Complex genome evolution of young polyploid complexes is poorly understood. Besides  
28 challenges caused by hybridization, polyploidization, and incomplete lineage sorting,  
29 bioinformatic analyses are often exacerbated by missing information on progenitors, ploidy,  
30 and reproduction modes. By using a comprehensive, self-developed bioinformatic pipeline  
31 integrating phylogenetic, structure, network, and SNP-origin analyses, we for the first time  
32 unraveled polyploid phylogenetic relationships and genome evolution within the large  
33 Eurasian *Ranunculus auricomus* species complex comprising more than 840 taxa. Our results  
34 rely on 97,312 genomic RAD-Seq loci, target enrichment of 576 nuclear genes (48 phased),  
35 and 71 plastid regions (Hyb-Seq; OMICS-data) derived from the 75 most widespread  
36 polyploid apomictic taxa and four di- and one tetraploid potential sexual progenitor species.  
37 Phylogenetic tree and structure analyses consistently showed 3–5 supported polyploid groups,  
38 each containing sexual progenitor species. In total, analyses revealed four diploid sexual  
39 progenitors and a one unknown, probably extinct progenitor, contributing to the genome  
40 composition of *R. auricomus* polyploids. Phylogenetic network, structure, and SNP-origin  
41 analyses based on RAD-Seq loci and phased nuclear genes completed by plastid data  
42 demonstrated predominantly allopolyploid origins, each involving 2–3 different diploid  
43 sexual subgenomes. Allotetraploid genomes were characterized by subgenome dominance  
44 and large proportions of interspecific, non-hybrid SNPs, indicating an enormous degree of  
45 post-origin evolution (i.e., Mendelian segregation of the diploid hybrid generations, back-  
46 crossings, and gene flow due to facultative sexuality of apomicts), but only low proportions of  
47 lineage-specific SNPs. The *R. auricomus* model system is the first large European polyploid  
48 species complex studied with reduced representation OMICS data. Our bioinformatic pipeline  
49 underlines the importance of combining different approaches and datasets to successfully

- 50 unveil how reticulate evolution and post-origin processes shape the diversity of polyploid  
51 plant complexes.

52 **Keywords**

53 allopolyploidy, Europe, genome evolution, plastome data, apomixis, RAD-Seq,

54 *Ranunculus auricomus*, target enrichment

## 55            **Introduction**

56            Polyploidy, the presence of two or more full genomic complements (whole genome  
57            duplication), occurs across the tree of life (Otto and Whitton 2000; Van De Peer et al. 2017;  
58            Rothfels 2021). Whole-genome duplications have been observed in seed plants, and in several  
59            lineages of animals (mainly fish and amphibians), fungi, and protists (Mable et al. 2011; Van  
60            De Peer et al. 2017; Blischak et al. 2018). Polyploid cells and tissues occur throughout nature  
61            (also in humans) and are regarded as a cellular strategy for higher stress tolerance  
62            (Schoenfelder and Fox 2015; Fox et al. 2020).

63            All flowering plants are ancient polyploids, as at least one polyploidization event  
64            occurred in their common ancestor, and several additional ones in various lineages (Soltis and  
65            Soltis 2016; Van de Peer et al. 2017; Leebens-Mack et al. 2019). Neopolyploid formation for  
66            flowering plants is estimated to range between 30–70% of species and to cause upshifts of  
67            diversification rates in young polyploid complexes (Wood et al. 2009; Soltis et al. 2015;  
68            Landis et al. 2018). Key innovations in flowering plants have been hypothesized to be  
69            connected to polyploidy, for example, the carpel, double fertilization, and vessel elements  
70            (Soltis et al. 2015; Soltis and Soltis 2016; Leebens-Mack et al. 2019). In addition to its  
71            evolutionary significance, important crop plants are natural polyploids (e.g., wheat, potato,  
72            strawberry, coffee, cotton), and their evolution has often been exploited for agricultural  
73            purposes (Gordon et al. 2020).

74            The presence of multiple gene copies in polyploids allows for gene neo- and  
75            subfunctionalizations, epigenetic changes, and consequently a differential expression of  
76            homeologous genes (Comai 2005; Blischak et al. 2018). Polyploidy provides larger  
77            physiological and phenotypic flexibility to respond to different environmental conditions  
78            (Hörandl 2006; Marchant et al. 2016; Van De Peer et al. 2017; Karbstein et al. 2021), which

79 facilitates colonization of various ecosystems (Te Beest et al. 2011; Rice et al. 2019; Fox et  
80 al. 2020; Meudt et al. 2021).

81           Genome evolution of polyploid lineages is complex and not only shaped by  
82 evolutionary origin and the genomic contributions of progenitors, but also by post-origin  
83 processes, resulting in a mosaic-like genome structure with parental, additive, and novel  
84 features (Soltis et al. 2015). Different polyploid formation types influence genome evolution:  
85 Autopolyploids arise within a species (tree-like evolution), whereas allopolyploids are formed  
86 by hybridization between different species/lineages followed by polyploidization (network-  
87 like evolution; Comai 2005; Wendel 2015; Blischak et al. 2018). Consequently,  
88 autopolyploids contain genetically similar subgenomes whereas genomes of allopolyploids  
89 are composed of previously diverged subgenomes. Allopolyploidization is considered  
90 particularly likely to create biotypes with novel genomic features (Abbott et al. 2013; Van de  
91 Peer et al. 2020; Rothfels 2021). For instance, allopolyploids showed higher degrees of  
92 genomic, transcriptomic, and epigenetic changes than autopolyploids (Comai 2005; Chen et  
93 al. 2007; Wendel 2015; Soltis et al. 2015; Spoelhof et al. 2017).

94           After evolutionary origin, the genome structure of neopolyploids is fluid over  
95 evolutionary time scales, and genomes revert to a functionally diploid state (Soltis et al. 2015;  
96 Van De Peer et al. 2017). At the beginning of this process, various mechanisms influence  
97 polyploid genomes. Expression bias due to epigenetic changes and homeologous gene loss  
98 (biased fractionation) after polyploidization can cause subgenome dominance (Soltis et al.  
99 2015; Wendel 2015; Blischak et al. 2018; Alger and Edger 2020). Moreover, Mendelian  
100 segregation in the first diploid hybrid generations before polyploidization, and/or  
101 backcrossing of polyploids to their sympatric progenitors might distort the original  
102 subgenome contributions (Barke et al. 2018; Hodač et al. 2018; Wagner et al. 2020). Gene

103 flow between polyploid lineages further influences genome structure (Melichárková et al.  
104 2020).

105 In plants, polyploidization and/or hybridization are frequently connected to apomixis,  
106 i.e., reproduction via asexually-formed seeds (Asker and Jerling 1992; Brukhin et al. 2018;  
107 Hojsgaard and Hörandl 2019). Noteworthy, not all neopolyploids are apomicts (e.g., Masci et  
108 al. 1994), and not all apomicts are polyploids (e.g., Brukhin et al. 2018). Apomixis is usually  
109 facultative, and residual sexuality allows for backcrossing to progenitors and intercrossing of  
110 polyploids, resulting in huge networks of hundreds to thousands hybridogenetic lineages (Fig.  
111 1). Such complexes occur in many abundant plant genera, e.g., dandelions (*Taraxacum*),  
112 hawkweeds (*Hieracium* s.l.), brambles (*Rubus*), and *Citrus*. With higher ploidy levels and/or  
113 time, these lineages are expected to become fixed, and mutations remain as the only source of  
114 genetic variation (Grant 1981; Coyne and Orr 2004; Fig. 1). With reduced recombination,  
115 heterozygosity in allopolyploids is additionally increased by allelic sequence divergence in  
116 asexual lineages (Meselson effect; Welch and Meselson 2000; Pellino et al. 2013). Studies  
117 using genome-wide data showed that heterozygosity significantly increased with higher  
118 ploidy levels (Mohammadin et al. 2018; Karbstein et al. 2021). In general, heterozygosity has  
119 several benefits, such as novel genetic combinations, heterosis, buffering effects of  
120 deleterious mutations, or changes in secondary metabolites (Comai 2005; Qiu et al. 2020).  
121 Increased heterozygosity is considered an important factor for the spreading of polyploids  
122 towards more variable climatic conditions (Hörandl 2006; Rice et al. 2019; Karbstein et al.  
123 2021).

124



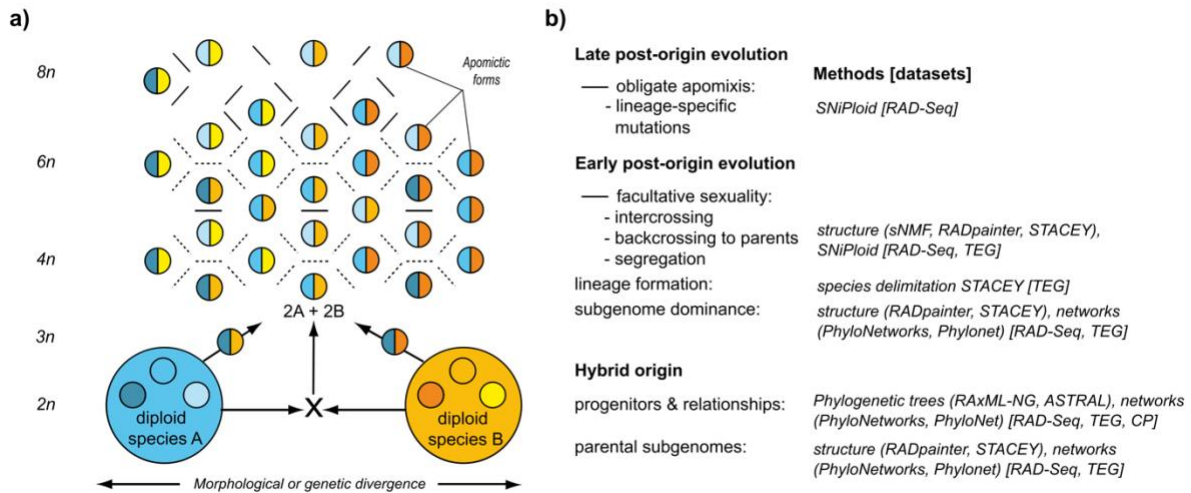

125

126 **Fig. 1**

127

128 Despite the evolutionary, ecological, and economical importance of polyploidy, the  
 129 understanding of phylogenetic relationships, genome diversity and evolution of fast-evolving,  
 130 young polyploid species complexes remains limited. Traditional sequencing markers from  
 131 organellar DNA were insufficient for reconstructing reticulate relationships in polyploid  
 132 complexes because of uniparental inheritance (Rothfels 2021). Nuclear markers from single  
 133 regions (e.g., ribosomal DNA) are biased by a strong marker-specific evolution (e.g., Zarrei et  
 134 al. 2014; Fehrer et al. 2021). Historically, polyploids were thus often avoided or dropped in  
 135 phylogenetic studies (Freyman et al. 2020; Rothfels 2021). Already the sexual progenitors of  
 136 polyploid complexes are often characterized by low genetic divergence, incomplete lineage  
 137 sorting (ILS), gene flow, and partial hybridogenic origins (Hörandl 2018; Pease et al. 2018;  
 138 Wagner et al. 2019; Karbstein et al. 2020a, 2020b). The use of ‘OMICS’-data provides orders  
 139 of magnitude more information compared with traditional genetic markers (Harrison and  
 140 Kidner 2011; Soltis et al. 2013). OMICS-data have proven effective at resolving diploid (and  
 141 few polyploid) phylogenetic relationships of species that diversified more than 30 or even less  
 142 than 0.1 Ma (Pellino et al. 2013; Hipp et al. 2014; Carter et al. 2019; Gordon et al. 2020;  
 143 Karbstein et al. 2020b; Tomasello et al. 2020; Wagner et al. 2020).

144           Currently, two main reduced representation approaches of OMICS-data are commonly  
145 used: restriction site-associated DNA sequencing (RAD-Seq; and similar methods) and target  
146 enrichment (hybrid capture). RAD-Seq covers a subset of anonymous, non-coding and coding  
147 regions across of the entire genome and is mostly used for population genomics and  
148 phylogenomics of closely related species within genera, up to tens of million years of  
149 divergence (Davey et al. 2011, Ree and Hipp 2015, McKain et al. 2018). RADseq is less  
150 costly and work-intense compared to target enrichment (McKain et al. 2018), and hence  
151 allows to process larger sample sets. Target enrichment usually addresses a subset of several  
152 hundreds of low-copy nuclear genes, and thus provides more conservative markers for  
153 resolving relationships within and among genera (Schmickl et al. 2016; McKain et al. 2018;  
154 Carter et al. 2019; Tomasello et al. 2020; Melichárková et al. 2020).

155           Although RAD-Seq yields much more information (number of loci and SNPs) than  
156 target enrichment, locus dropout caused by mutation accumulation in cutting sites can become  
157 more and more problematic with increasing species divergence (but see in Eaton et al. 2017  
158 for the influence of sequencing coverage). Moreover, the correct definition of loci and  
159 filtering of paralogs based on anonymous short sequence reads is a bioinformatic challenge  
160 (Ree and Hipp 2015; O’Leary et al. 2018; McKain et al. 2018). Target enrichment loci are  
161 predefined from probe design and assembled loci are usually longer (McKain et al. 2018),  
162 allowing for gene tree estimation and allele phasing, and thus coalescent-based methods.  
163 Allelic information (segregating markers at a single locus) is particularly important for correct  
164 phylogenetic inferences in highly reticulate, young evolutionary relationships (Eriksson et al.  
165 2018). Coalescent-based models can reconstruct correct species trees and estimate species  
166 boundaries while accounting for stochastic processes like ILS (Rannala and Yang 2003; Jones  
167 et al. 2015; Rannala 2015). In addition, plastid data can be easily gained from off-target reads  
168 of target enrichment (Hyb-Seq; Weitemier et al. 2014; Folk et al. 2015; McKain et al. 2018).

169 The incorporation of plastid data into network reconstruction to gain information on the  
170 maternal progenitor has been largely overlooked in the last few years. Nuclear-plastid  
171 discordances have been assessed on shallow to deep phylogenetic scales, and elucidated  
172 group-specific evolutionary processes (Huang et al. 2014; Stull et al. 2020).

173 Elucidating the evolution of allopolyploids is even more challenging due to reticulate  
174 evolution. Tree methods can give a first phylogenetic framework for polyploid  
175 reconstructions when no previous phylogenetic study exists. Particularly in evolutionary  
176 young species complexes containing genetically close taxa (see e.g. McDade 1992 for tree  
177 stability in presence of hybrids from closely related taxa) and without any previous  
178 knowledge about auto- vs. allopolyploid origins, trees and (quartet) support values can give  
179 valuable information on conflicting signals. For example, a non-conflicted, tree-like pattern  
180 rather hints at autopolyploids whereas trees with low (quartet) support values can indicate the  
181 presence of reticulations and/or ILS (Lo et al. 2010; Brandrud et al. 2020; Karbstein et al.  
182 2020b, Tomasello et al. 2020). However, hybridogenic, network-like origins cannot be  
183 inferred by both standard and coalescent methods based on bifurcating models, leading to  
184 incongruences in tree reconstructions (McBreen and Lockhart 2006; Rothfels 2021).  
185 Consequently, phylogenetic relationships should not (only) be presented by bifurcating trees  
186 (McDade 1992, 1995; Huson and Bryant, 2006; Rothfels 2021).

187 Distance-based network methods like for example the popular NeighborNet algorithm  
188 can visualize reticulate relationships better than trees, but detailed information on ancestry or  
189 parentage in hybrid scenarios requires phylogenetic networks (Huson and Bryant 2006;  
190 Oxelman et al. 2017). Recently developed software can model network-like evolution with  
191 maximum pseudolikelihood from gene trees or SNP-based multilocus sequence data under the  
192 coalescent model accommodating ILS (e.g., PhyloNet or PhyloNetworks; Than et al. 2008;  
193 Solís-Lemus et al. 2017; Wen et al. 2018; Olave and Meyer 2020; Flouri et al. 2020).

194           Phylogenetic network inference requires information on ploidy level and diploid  
195 progenitors, allowing correct heterozygosity estimations and allele phasing in polyploids.  
196 Recently, an increasing number of studies focused on network estimations and technical  
197 improvements in polyploid reconstructions (e.g., phasing, allele sorting, subgenome  
198 assignment, or modeling the (allo)polyploidization process; Bertrand et al. 2015; Jones 2017a;  
199 Oberprieler et al. 2017; Dauphin et al. 2018; Cao et al. 2019; Lautenschlager et al. 2020;  
200 Freyman et al. 2020, Yan et al. 2020; Šlenker et al. 2021; Tiley et al. 2021). Nevertheless,  
201 knowledge on putative progenitor species, number of contributing progenitors, ploidy levels,  
202 and formation types of the polyploids within large species complex are frequently missing.  
203 Moreover, only one resource-intensive program is currently capable to model the  
204 polyploidization process itself, i.e., that homeologues of an allotetraploid share demographic  
205 parameters or divergence times from their progenitors (Jones 2017a). In addition, for current  
206 allele assignment methods (e.g., Lautenschlager et al. 2020; Šlenker et al. 2021), subgenomes  
207 should be well genetically differentiated, sequences of the diploid parents available/not  
208 extinct, and locus/gene datasets not too big. Therefore, more sophisticated methods (e.g.,  
209 polyploid networks, multi-labeled subgenome trees) are often not applicable at that stage of  
210 research and/or currently still inappropriate for young polyploid species complexes.

211           Even with this information, reconstruction of relationships and discrimination between  
212 auto- and allopolyploid scenarios might be difficult. For example, when using maximum  
213 likelihood (or pseudo-likelihood) approaches, likelihood scores of networks are usually not  
214 directly comparable to those of trees. A-posteriori model comparisons need to be applied to  
215 discriminate among scenarios with different numbers of reticulations (e.g., Kamneva et al.  
216 2017; Cai and Ané 2020). Moreover, a correct and unequivocal network inference is hard to  
217 reconstruct in young species complexes where progenitors exhibit high levels of genetic  
218 admixture and polyploids possess high levels of genome-wide heterozygosity. Therefore,

219 relationships, reticulate evolutionary processes, genome composition, structure, and evolution  
220 within large polyploid species complexes remain largely uninvestigated.

221 In this study, we unravel for the first time the evolutionary processes shaping  
222 apomictic polyploid complexes on the model system *Ranunculus auricomus* by using  
223 reduced-representation genomic data. The complex ranges from Greenland, Europe to  
224 Western Siberia, and spans arctic, boreal, temperate, and Mediterranean climates (Jalas and  
225 Suominen 1989). Linnaeus (1753) already described a species with dissected basal leaves,  
226 *R. auricomus*, and one with undivided basal leaves, *R. cassubicus*. Since then, more than 840  
227 taxa (morphospecies) have been described, inhabiting stream- and riversides, and semi-dry to  
228 marshy meadows and forests (Karbstein et al. 2020b, 2021). Most of these taxa are tetra- to  
229 hexaploid and apomictic (Jalas and Suominen 1989; Karbstein et al. 2021). Only four di- and  
230 one tetraploid, genetically and geographically distinct, sexual species were detected so far and  
231 originated 0.83–0.58 Mya (Karbstein et al. 2020a, 2020b; Tomasello et al. 2020):  
232 *R. cassubicifolius* s.l. (di- and autotetraploid) and *R. notabilis* s.l. (diploid) are most distantly  
233 related whereas *R. flabellifolius*, *R. envalirensis* s.l. (both diploid), and *R. marsicus*  
234 (tetraploid), are grouped in intermediate positions (Karbstein et al. 2020b). *R. cassubicifolius*  
235 s.l. and *R. flabellifolius* are characterized by non-dissected basal leaves whereas the other  
236 species show a strongly heterophyllous cycle with dissected basal leaves during anthesis  
237 (Karbstein et al. 2020b).

238 Vicariance processes probably triggered allopatric speciation during climatic  
239 deteriorations in the late Pleistocene from a widespread European ancestor (Tomasello et al.  
240 2020). It has been hypothesized that the large number of asexual, mainly tetra- to hexaploid  
241 polyploids arose from hybridization of sexual progenitors (Hörandl et al. 2009; Hodač et al.  
242 2014, 2018; Hojsgaard et al. 2014; Barke et al. 2018). Some polyploid apomicts are probably  
243 less than 0.1 Mya (Paun et al. 2006; Pellino et al. 2013). They occupy larger, more northern

244 areas, possess higher levels of genome-wide heterozygosity, and are obligate apomictic or  
245 with low levels of facultative sexuality (Karbstein et al. 2021). Nevertheless, origin,  
246 relationships, and genomic composition of the polyploid complex have never been analyzed  
247 due to genetic and bioinformatic limitations.

248         In this study, we compare a comprehensive taxon sampling based on genomic RAD-  
249 Seq data (280 individuals, 80 taxa), (phased) nuclear genes (113 individuals, 50 taxa), and  
250 plastid regions (87 individuals, 45 taxa), to unravel phylogenetic relationships and genome  
251 composition of the large, evolutionary young, *R. auricomus* polyploid complex. We use a  
252 comprehensive, self-developed bioinformatic pipeline combining previous knowledge about  
253 sexual progenitors, ploidy and reproductive data with tree, structure, network, and SNP-origin  
254 methods across different datasets (Fig. 1) to answer the following questions: (i) Are the  
255 applied tree analyses able to give a first phylogenetic framework, and do well-supported  
256 (main) clades exist? (ii) Do genomic, nuclear-gene, and plastome data reveal congruent tree  
257 topologies or rather conflicting signals due to reticulate evolution? (iii) Do RAD-Seq or  
258 phased nuclear gene data reflect any clear genetic and/or geographical structure? (iv) Are  
259 polyploid lineages of auto- or allopolyploid origin? (v) If the latter, how many progenitors  
260 contributed to their genomes? (vi) To which extent are polyploid genomes influenced by post-  
261 origin evolution? (vii) How can analyses of RAD-Seq and Hybseq data be integrated for  
262 unraveling evolutionary processes in polyploid complexes?

263           **Materials & Methods**

264           **Population Sampling**

265           In the present study, we included four di- and one tetraploid sexual species, and 75 of  
266 the most widespread, tri- to hexaploid apomictic *R. auricomus* taxa. The new classification of  
267 sexual species is described in Karbstein et al. (2020b). Ploidy and reproduction mode  
268 measurements of *R. auricomus* individuals and populations (sexual, and facultative and  
269 obligate apomictic) needed for the performed analyses herein are published in Karbstein et al.  
270 (2021) (see also Supplementary Table S1, Figs. S4, S5 in Karbstein et al. 2021, and data on  
271 FigShare). The diploids *R. sceleratus* and *R. pygmaeus* were used as outgroups. We collected  
272 silica-gel dried leaf material from living plants for all genetic analyses, and additionally, leaf  
273 material from herbarium specimens for target enrichment analyses. Finally, we used 280  
274 samples originating from 235 collection sites (populations) across Europe for further analyses  
275 (Fig. 2, Supplementary Table S1). Concerning genomic analyses, the sexual progenitor  
276 species were treated as parental subgenomes and abbreviated according to the legend of Fig.  
277 2.

278

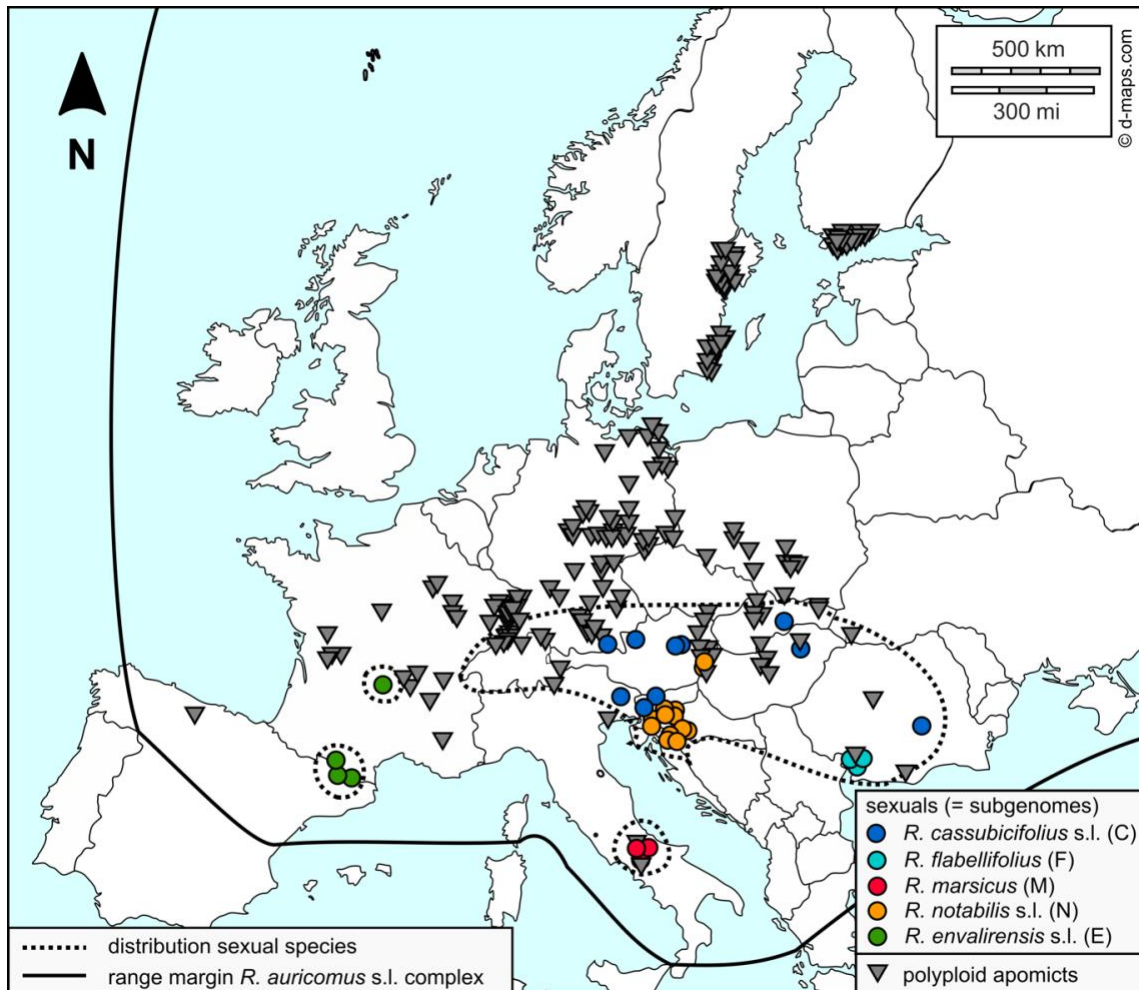

279

280 **Fig. 2.**

281

## 282 **Laboratory Work, Locus Assembly, and Parameter Optimization**

283 DNA extraction of 280 *R. auricomus* and outgroup samples, adjustment of DNA

284 concentration, DNA quality check, RAD lab workflow and sequencing with the cutting

285 enzyme *PSTI* and single-end RAD sequencing of 100bp reads (Baird et al. 2008), raw read

286 quality check, raw read demultiplexing, removal of adapter sequences and restriction

287 overhang, and further quality filtering in IPYRAD (Eaton and Overcast 2020) followed

288 Karbstein et al. (2020b, 2021). Here, we used the already sequenced samples of Karbstein et

289 al. (2020b, 2021).



290 *PSTI* is a methylation-sensitive enzyme and hence can considerably reduce the  
 291 fraction of repetitive elements that is otherwise very high in plants. Therefore, the enzyme  
 292 targets mostly nuclear genes and a few organelle sites (Fellers 2008). This dataset of coding-  
 293 and non-coding regions complements the markers derived from expressed genes  
 294 (transcriptomes of flowering buds) and selected for target enrichment (see Tomasello et al.  
 295 2020 for baits design in *R. auricomus*) to get a comprehensive representation of the nuclear  
 296 genome. Target enrichment further provides markers of the plastid genome. The self-  
 297 developed, bioinformatic pipeline combining different datasets and analyses, and previously  
 298 published *R. auricomus* studies (sexual progenitor species, reproduction modes) is illustrated  
 299 in Fig. 3.

300

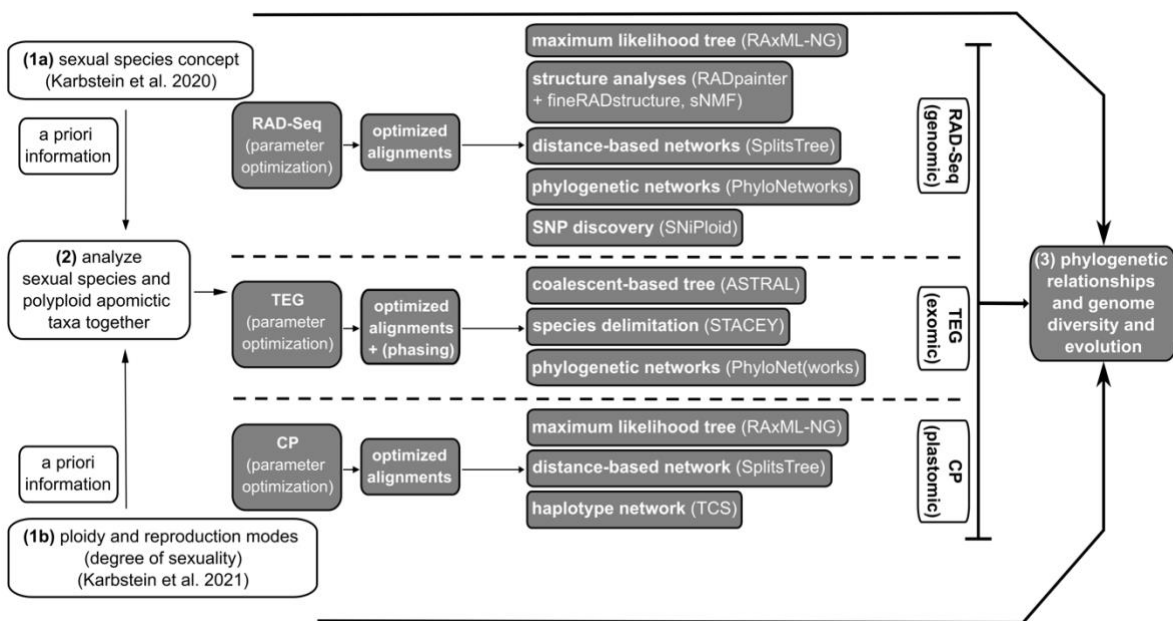

301

302 **Fig. 3**

303

304 For target enrichment, we added 85 newly sequenced polyploid apomictic samples to  
 305 the already existing 28 samples sequenced by Tomasello et al. (2020) (113 samples in total;  
 306 Supplementary Table S1). All plastome data (CP) from off-target reads is published here. We

307 included almost the same samples as in the RAD-Seq analyses and added as described above  
308 herbarium specimens (types or collections from type locations; Supplementary Table S1). We  
309 used the bait set as described previously in Tomasello et al. (2020), consisting of 17,988  
310 probes and capturing 736 target genomic regions. Library preparation and hybrid capture  
311 protocols are available as Supplementary Text S1 in Tomasello et al. (2020). Libraries were  
312 sequenced in five different paired-end runs (24 samples each) with 2×250-bp on an Illumina  
313 MiSeq system at NGS Integrative Genomics Core Unit of the University of Göttingen  
314 (Germany).

315         For *de novo* assembly of RAD-Seq loci and parameter optimization, we used IPYRAD  
316 vers. 0.9.14 (and vers. 0.9.52) on the local HPC-Cluster (GWDG, Göttingen, Germany). For  
317 parameter optimization, we applied an already established workflow accounting for different  
318 ploidy levels of *R. auricomus* individuals: The within-sample clustering similarity threshold  
319 was optimized for each ploidy level ( $2n-6n$ ) balancing number of RAD-Seq clusters, cluster  
320 depth, and clusters rejected due to high heterozygosity. Then, the among-sample clustering  
321 threshold was optimized for the merged assembly optimizing number of polymorphic loci,  
322 SNPs, loci filtered by maximum number of SNPs, removed duplicates, shared loci, and new  
323 polymorphic loci. Maximum number of SNPs per locus and of indels per locus were  
324 increased to 30% and 12, respectively, to account for greater genetic variation in polyploids as  
325 described in Karbstein et al. (2021).

326         For subsequent analyses, we created a ‘without-outgroup’ and a ‘total’ dataset. To  
327 assess effects of number of loci and missing data on phylogenetic analyses (Eaton et al. 2017;  
328 O’Leary et al. 2019; Karbstein et al. 2020b), we selected different minimum amounts of  
329 samples per locus and created ‘min10’ (10%), ‘min30’ (30%), and ‘min50’ (50%) alignments  
330 balancing the specific program requirements and informativeness of datasets (see below). The  
331 final sample size totals 282 individuals (incl. outgroup). For both datasets, sample filtering led

332 to ca. 74% (min10), 55% (min30), and 44% (min50) missing data in the final sequence  
333 matrices.

334 For target enrichment data analysis, reads were processed with HybPhyloMaker vers.  
335 1.6.4 (Fér and Schmickl 2018) (Supplementary Text S1), using the target regions (exons)  
336 selected for the bait design from transcriptomes as ‘pseudoreference’ for read mapping  
337 (Supplementary Table S2 in Tomasello et al. 2020). Samples with more than 40% missing  
338 data were filtered out from each exon region. In addition, only loci including more than 90%  
339 of samples were further processed (579 genes). From those 579 genes, 50 loci were selected  
340 for the species delimitation and phylogenetic network analyses, to be informative, non-  
341 homoplasious, and free from paralogue sequences. To select these loci, we assessed four  
342 different parameters across the 579 alignments, scoring the respectively best performing 25%  
343 of loci with 1 and the remainder with 0. The parameters were the following (Herrando-  
344 Moraira et al. 2018): (i) the  $R^2$  of mutational saturation regression curves (Philippe and  
345 Forterre 1999), (ii) the standard deviation of the sample-specific long-branch scores (LB  
346 scores; Struck et al. 2014), (iii) the clocklikeness, and (iv) average bootstrap (BT) support.  
347 This was done (i-iii) following the idea that in such a young species group like *R. auricomus*  
348 evolutionary rates will not change considerably among branches in orthologous regions.  
349 Finally, we selected the 50 loci with the highest overall score (Supplementary Table S3).

350 For inference of polyploid origins, retrieving allelic information is crucial. We phased  
351 these 50 most informative loci using a similar approach as described in Eriksson et al. (2018).  
352 We processed the mapped BAM files of all samples with SAMtools vers. 0.1.19 (Li et al.  
353 2009) (‘sort’ and ‘phase’ commands). The polyploid samples (tri- to hexaploids) were phased  
354 further, looking at the phased BAM files in IGV vers. 2.8.9 (Robinson et al. 2011) (usually  
355 one of the BAM files was a consensus of alleles with some vowels corresponding to the  
356 heterozygous sites) and manually adding alleles in relation to the known ploidy level to the

357 alignments using AliView vers. 1.26 (Larsson, 2014). For two of the 50 loci, it was not  
358 possible to unequivocally detect alleles in at least one of the polyploid samples. Therefore, we  
359 excluded these two loci from further analyses (Supplementary Table S4).

360 Off-target reads were used to gain information on the plastid genome again performing  
361 HybPhyloMaker. We used the *Ranunculus repens* plastid genome as reference  
362 (Supplementary Table S5). Considering the low number of mapped reads and the resulting  
363 highly fragmented alignments, we excluded regions and samples with the highest amounts of  
364 missing data, to minimize phylogenetic inaccuracy in the subsequent analyses. First, we  
365 excluded samples with more than 50% missing data (from each plastome region separately),  
366 and regions containing sequence information for fewer than 50% of the samples. Second, we  
367 excluded from all regions all samples missing from more than 50% of the alignments. After  
368 filtering, we retrieved a subset of 71 regions including genes and intergenic spacers, for 87  
369 samples from the original 113 (Supplementary Table S6).

370

### 371 **Maximum Likelihood Tree and Quartet Sampling (RAD-Seq)**

372 To infer phylogenetic relationships among sexuals and polyploid apomicts (Figs. 1, 3),  
373 maximum likelihood (ML) analyses were performed with RAxML-NG vers. 0.9.0 (Kozlov et  
374 al. 2019) on the final RAD-Seq min10, min30, and min50 datasets. As input, we used the  
375 \*.phy IPYRAD output files (each individual characterized by one sequence [majority-rule  
376 base calling], all loci concatenated into a supermatrix). Alignment patterns were compressed  
377 and stored in binary formats (RBA). Then, we inferred the respective tree under the  
378 GTR+GAMMA model with 10 random and 10 parsimony starting trees. Standard non-  
379 parametric BT were performed, and the MRE-based bootstopping test (cutoff: 0.05) applied.  
380 Felsenstein bootstrap proportion (FBP) and transfer bootstrap expectation (TBE) values were  
381 calculated by RAxML-NG. TBE is more appropriate for large phylogenies (>300 samples)

382 and for phylogenies with conflicted (deep) branches compared to FBP (e.g., hybridization  
383 events; Lemoine et al. 2018). FBP and TBE values were mapped by RAxML-NG onto the  
384 best-scoring ML trees. The min10 compared with min30 and min50 alignments showed the  
385 highest mean BT support (FBP: 70/66/47, TBE: 85/82/64) and the largest number of  
386 monophyletic taxa (13/10/9) (Supplementary Figs. S1–S3a–d). Moreover, the min10 tree  
387 topology was similar to min30 and min50 tree topologies (Fig. 4a, Supplementary Figs. S1,  
388 S2). Therefore, we selected the min10 tree for final interpretations.

389 We addressed potentially inflated BT values in concatenated analyses with ‘Quartet  
390 Sampling’ (QS) vers. 1.3.1 (Weisrock et al. 2012; Shen et al. 2017; Pease et al. 2018; and see  
391 also Karbstein et al. 2020b). The quartet concordance score (QC) is defined as the ratio of  
392 concordant to both discordant quartets (1: all concordant, > 0: more concordant patterns, < 0:  
393 more discordant patterns), the quartet differential score (QD) indicates the skewness of both  
394 discordant patterns (1: equal, 0.3: skewed, 0: all topologies 1 or 2), and the quartet  
395 informativeness score (QI) describes the proportion of informative replicates (1: all  
396 informative, 0: none informative; see Pease et al. 2018). QD values around 1 indicate ILS  
397 (presence of both discordant topologies) whereas QD values towards 0 hint at directional  
398 introgression (presence of one alternative topology; Pease et al. 2018; see also Karbstein et al.  
399 2020b). We set 100 replicates per branch and log-likelihood threshold cutoff to 2. The quartet  
400 concordance factor (QC), quartet differential (QD), and the quartet informativeness (QI)  
401 scores together with BT values were illustrated in Fig. 4a (detailed QS values in Fig. S3a–d).

402

### 403 **Coalescent-based Species Tree and Quartet Support (Targeted Genes)**

404 As an equivalent to ML trees for RAD-Seq alignments, we estimated a coalescent-  
405 based tree based on 576 target enriched genes. First, gene trees were inferred in RAxML vers.  
406 8.2.12 (Stamatakis 2014). Analyses were run with 100 standard BT replicates, setting the

407 GTR+GAMMA model and partitioning by exons. Second, gene trees were rooted and  
408 combined into a single newick file in HybPhyloMaker (Fér and Schmickl 2018). Third, the  
409 species tree was inferred by applying the coalescent-based algorithm implemented in  
410 ASTRAL III vers. 5.6.3 (Zhang et al. 2018) with 100 multilocus BT replicates. To assess the  
411 amount of gene tree conflict on branches, we measured quartet support on the ASTRAL tree  
412 (Sayyari and Mirarab 2016; Fig. 4b, Supplementary Fig. S4a–c).

413

#### 414 **Plastome Phylogeny and Network Analysis (CP)**

415 We used the 71 selected plastid regions to infer a ML tree with 100 BT replicates by  
416 RAxML-NG (Kozlov et al. 2019). Models of sequence evolution were assessed for each  
417 region separately using ModelTest-NG vers. 0.1.6 (Darriba et al. 2020). Alignments were  
418 concatenated (80,461 base-pairs in total) and different regions were treated as different  
419 partitions, each with its respective sequence evolution model.

420 To gain additional information about haplotype evolution, the concatenated matrix  
421 was used to infer a haplotype network with TCS vers. 1.13 (Clement et al. 2000). We used the  
422 web-based software tcsBU (Múrias Dos Santos et al. 2016) to produce a graphical  
423 representation of TCS haplotype network. In addition to the TCS networks, we calculated  
424 neighbor-net networks as described in Karbstein et al. (2021).

425

#### 426 **Genetic Structure (RAD-Seq)**

427 To investigate genetic structure of the polyploid species complex (Figs. 1,3), we first  
428 conducted analyses with RADpainter+fineRADstructure vers. 0.3.2 (Malinsky et al. 2018)  
429 using the \*.alleles.loci IPYRAD output files (each locus with a maximum of four allowed  
430 alleles (only two phases due to diploid SNP calls), with individual sequences). RADpainter is  
431 based on a coancestry matrix, uses all SNPs, allows a varying allele number, and tolerates

432 moderate amounts of missing data (Malinsky et al. 2018). We ran RADpainter to calculate the  
433 coancestry matrix, and used fineRADstructure to assign individuals to groups (1,000,000  
434 burn-in and 1,000,000 sample iterations) including a simple tree building (MCMC; 100,000  
435 burn-in). Finally, we plotted results using a modified R script of ‘fineRADstructurePlot.R’ (R  
436 vers. 4.0.3 (R Core Team 2020) for all R analyses). We then compared results of min10,  
437 min30, and min50 alignments. With increasing number of loci and missing data, an increased  
438 number of groups and genetic dissimilarity among groups was detected (Supplementary Fig.  
439 S5). Thus, we selected min10 for further interpretations.

440         Second, we carried out structure analyses applying sNMF within the R package ‘LEA’  
441 vers. 3.0.0 (Frichot et al. 2014; Frichot and François 2015). sNMF provides a fast and  
442 efficient estimation of individual coancestry, is robust to deviations from Hardy-Weinberg  
443 equilibrium, and can deal with moderate levels of missing data (Frichot and François 2015).  
444 We used \*.ugeno (each individual characterized by numbers indicating one randomly chosen  
445 per SNP locus) IPYRAD files, and set number of genetic clusters (K) from 1 to 80 (maximum  
446 number of included taxa), ploidy to 4 (as maximum), and repetitions to 7. To choose the  
447 number of ancestral Ks, we used the implemented cross-entropy criterion. Cross-entropies  
448 were plotted for all Ks. Across datasets, we found the optimal Ks between 3 and 5  
449 (Supplementary Fig. S6a–f). We plotted results of optimal Ks as bar graphs and across Europe  
450 (Supplementary Figs. S7a–c, S8a–c). Additionally, we displayed ancestry coefficients  
451 (method ‘max’, i.e., at each point the cluster for which the ancestry coefficient is maximal;  
452 Supplementary Figs. S9–11 without method ‘max’) of the respective best run of each K on  
453 geographical maps of Europe, using location coordinates and the R script POPSutilities.R  
454 (source: <http://membres-timc.imag.fr/Olivier.Francois/POPSutilities.R>; Supplementary Fig.  
455 S8a–c). The min30 datasets balanced number of loci and amounts of missing data and

456 revealed the most reasonable results (see explanation in legend of Supplementary Fig. S8, and  
457 was therefore selected for further interpretations.

458

### 459 **Genetic Structure (Targeted Genes)**

460 To unravel the genetic structure of the polyploid complex based on nuclear genes  
461 (Figs. 1, 3), we utilized the coalescent-based species delimitation approach of STACEY vers.  
462 1.2.1 (Jones 2017b). Input files were prepared in BEAUTI vers. 2.6.1 (Bouckaert et al. 2014)  
463 using the 48 phased loci. For the analyses, each sample was treated as ‘minimal cluster’ (i.e.,  
464 alleles of the same individuals were represented by a single tip in the species tree/species  
465 delimitation results). Sequence substitution models were selected for each locus separately  
466 using the Bayesian Information Criterion (BIC) in ModelTest-NG. Substitution models, clock  
467 models, and gene trees were treated as unlinked for all loci. To reduce the search space,  
468 parameters of the substitution models were fixed to those found in ModelTest-NG. The strict  
469 clock was enforced for all loci fixed at an average rate of 1.0 in one random locus while  
470 estimating all other clock rates in relation to this locus. We set the ‘collapse height’ to  $1 \times 10^{-5}$ ,  
471 which was estimated using a Beta prior with parameters  $\alpha=1.0$  and  $\beta=1.0$ , and which represent  
472 a flat distribution between 0 and 1 (i.e., all possible species delimitation scenarios have an  
473 equal prior probability). Finally, we gave to the bdcGrowthRate prior a log-normal  
474 distribution ( $M=4.6$  and  $S=1.5$ ), a gamma shape ( $\alpha=0.1$  and  $\beta=3.0$ ) to the popPriorScale prior,  
475 and for the relativeDeathRate, we set a beta prior ( $\alpha=1.0$  and  $\beta=1.0$ ; optimized in Karbstein et  
476 al. 2020b).

477 The analyses were run for  $2 \times 10^9$  iterations sampling every 200,000th generation in  
478 BEAST vers. 2.6.1 (Bouckaert et al. 2014). Two independent runs were performed and, after  
479 checking convergence between independent analyses and Effective Samples Size values (ESS  
480  $> 100$ ) in TRACER vers. 1.6 (Rambaut et al. 2018), we combined trees output files using



481 LogCombiner vers. 2.6.1 (Bouckaert et al. 2014) and discarding 10% of the analyses as burn-  
482 in (as described in Karbstein et al. 2020b). The obtained file was processed with the ‘species  
483 delimitation analyser’ (Jones et al. 2015). The similarity matrix was produced using a  
484 modified version of the R script (Jones et al. 2015).

485

### 486 **Detecting Subgenome Contribution for selected Polyploids (RAD-Seq, Target** 487 **Genes)**

488 To investigate genome diversity, composition, and evolution of polyploids in more in  
489 detail (Figs. 1,3), we selected 2–4 polyploid individuals with obvious reticulation (coancestry)  
490 signals per main genetic cluster and tested ten polyploids for subgenome contributions (H<sub>1</sub>-  
491 H<sub>10</sub>; Table 1, Supplementary Table S1). We used hybrid binomials to clearly distinguish these  
492 taxa from sexual species (Hörandl et al. 2009). RADpainter+fineRADstructure analyses  
493 include all SNPs per locus and varying ploidy levels (Malinsky et al. 2018), and is therefore  
494 here considered as superior compared with sNMF and SplitsTree (1 SNP/locus). Therefore,  
495 we evaluated the RADpainter coancestry matrix, and calculated a median coancestry value of  
496 343 (mean right-skewed). We took the median as the critical threshold to assess the potential  
497 subgenome contributions of polyploids. The same procedure was also applied to the STACEY  
498 posterior probability matrix (median=0.000555). To ensure comparability among datasets, we  
499 aimed at selecting the same individuals. Only for ‘*R. × elatior*’ (H<sub>2</sub>), we selected another  
500 individual in STACEY analysis (*R. × elatior* is monophyletic, Supplementary Figs. S1–S4a–  
501 c).

502

### 503 **Phylogenetic Network Analyses (RAD-Seq)**

504 To corroborate the already gained information by appropriate network methods (Figs.  
505 1,3), we carried out analyses with PhyloNetworks vers. 0.12.0 (Solís-Lemus et al. 2017).

506 PhyloNetworks allows network inference with maximum pseudolikelihood from multilocus  
507 sequences (SNaQ). SNaQ uses a multi-species network coalescent model (MSNC) that is  
508 capable of handling ILS (Solís-Lemus et al. 2017). Since SNPs were not intended as input for  
509 SNaQ, we used the recently published function SNPs2CF.R vers. 1.2 (Olave and Meyer 2020)  
510 to transform SNP-based RAD-Seq alignments into quartet concordance factors (CF). We  
511 selected the min30 dataset to avoid bias of network analyses by excessively high amounts of  
512 missing data. We converted the \*.ustr (each individual characterized by numbers indicating  
513 one randomly chosen SNP per locus, two phases (maximum of four allowed alleles) per  
514 individual) IPYRAD file with a custom R script to an adequate input format for SNPs2CF.  
515 Network analyses are computationally intensive. Thus, we created ten subsets each containing  
516 one tetraploid accession (individual) and all available accessions (individuals) of diploid  
517 sexual progenitor species. The above-mentioned, preselected tetraploids were used for subset  
518 building (see Detecting Subgenome Contribution for selected Polyploids). We excluded the  
519 sexual tetraploid *R. marsicus* from network analyses because no significant subgenome  
520 contribution of this species was observed in previous genetic structure analyses. We used the  
521 converted \*.ustr files and imap files containing individual-species associations as input for  
522 SNPs2CF. We specified ‘between species only’ comparisons, no maximum number of SNPs,  
523 maximum number of quartets of 1000, and 100 BTs.

524 We used the received quartet CF matrices and quartet-CF-based starting trees to run  
525 maximum pseudolikelihood (SNaQ) analyses with default settings. We initially allowed no  
526 hybridization event. Afterward, the output was used as a start network (net0) for the next  
527 analysis allowing one hybridization event (net1). Per polyploid, the likeliest network was  
528 commonly the one with the polyploid as hybrid (seven out of ten). The polyploids H<sub>4</sub>, H<sub>5</sub>, and  
529 H<sub>9</sub>, were not inferred as the likeliest hybrids. An explanation might be the low genetic  
530 divergence among polyploids and diploid progenitors causing problems in ILS and

531 hybridization modeling. However, since SNaQ (PhyloNetworks) takes no hybrid constraint  
532 and polyploids cannot be the progenitor of diploid sexuals here, we had to select the less  
533 likely hybrid network in these cases for further polyploid analyses.

534

### 535 **Phylogenetic Network Analyses (Targeted Genes)**

536 To assess the validity of previous structure and RAD-Seq-network results (Figs. 1, 3),  
537 we additionally performed phylogenetic network analyses using the 48 phased target genes.  
538 We also investigated  $H_{1-10}$ , taking gene trees as input and two different, separately performed,  
539 coalescent-based approaches: SNaQ implemented in PhyloNetworks (Solís-Lemus et al.  
540 2017) as for RAD-Seq data and the maximum pseudolikelihood (InferNetwork\_MPL)  
541 approach implemented in Phylonet vers. 3.8.2 (Than et al. 2008; Wen et al. 2018). Phylonet is  
542 one of the most widely used and established programs for species tree/network  
543 reconstructions based on multilocus datasets. We told both programs that all alleles (phases in  
544 RAD-Seq-based networks) of diploid species are from their respective species, and alleles  
545 (pseudophases in RAD-Seq-based networks) of the polyploid are only from the single  
546 polyploid accession. Thus, we used network results based on phased nuclear genes for further  
547 validation of previous results.

548 For each polyploid testing, alignments were modified to include all diploid accessions  
549 (except for *R. cassubicifolius* s.l. LH006 and EH9126, and *R. flabellifolius* LH021; 22  
550 samples in total) and the polyploid individuals. Models of sequence evolution were selected  
551 with ModelTest-NG, and 100 BT gene trees were inferred with RAxML-NG for each of the  
552 48 selected loci. Therefore, 100 gene trees per locus (4,800 trees in total) were used as input,  
553 to incorporate gene tree uncertainty while inferring species networks (and to ensure dataset  
554 comparability for SNAQ and PhyloNet). For the PhyloNetworks analyses, we used the gene  
555 trees and a mapping file (mapping alleles to species) to calculate a species-wise CF table. We

556 continued the analyses as for the RAD-Seq dataset, with the only exception that the starting  
557 tree was inferred using ASTRAL III. For the Phylonet MPL analyses, the polyploid was  
558 always specified as the putative hybrid. We performed 10 runs per search, each returning five  
559 optimal networks. After the search, the returned species networks were optimized for their  
560 branch lengths and inheritance probabilities under full likelihood (-po option in PhyloNet),  
561 using the default settings.

562

### 563 **Subgenome Contributions and Polyploid Origin (RAD-Seq, Target Genes, and** 564 **CP)**

565 We applied criteria for building consensus results on previously generated genetic  
566 structure and phylogenetic network results (details in legend of Supplementary Table S7). We  
567 mainly assessed the parental subgenome contributions per polyploid individual as follows: (i)  
568 take the most abundant parent within a column; (ii) if there were two equally abundant  
569 parents (e.g., two-times sexual progenitor subgenomes C and F) within a column, both  
570 parental subgenome contributions were taken for the consensus result (e.g., C/F); (iii) if two  
571 parental subgenome contributions within a column existed, we included them with a value of  
572 '0.5' (instead of '1.0') in consensus calculations.

573 To validate the obtained consensus results and to infer genome evolution (tree-like,  
574 autopolyploid vs. network-like, allopolyploid), we submitted all previously generated results  
575 (before consensus results building) to the full likelihood approach implemented in PhyloNet.  
576 The CalcProb function calculates the likelihood of gene trees under a given species network  
577 and thus the total likelihood of the same network. Thus, we employed the gene trees used in  
578 the network analyses based on the target enrichment dataset mentioned above.

579 To include RADpainter+fineRADstructure and STACEY results, networks were  
580 manually constructed using the tree backbone topology in Karbstein et al. (2020b) and the

581 first two putative progenitors identified by these methods (Supplementary Table S7). The  
582 autopolyploid scenario was tested utilizing the ASTRAL III trees already used as starting tree  
583 for the PhyloNetworks analyses. We rooted all networks with *R. cassubicifolius* s.l. to make  
584 scenarios more comparable. To compare tree-like (autopolyploid) scenarios with network-like  
585 (allopolyploid) ones, we scored results using the Akaike Information Criterion (AIC), taking  
586 into account that the number of parameters in a tree/network is equal to the number of branch  
587 lengths plus (for the networks) the parental contributions (i.e.,  $k=8$  and  $k=13$  for the tree and  
588 the networks, respectively).

589 We determined the final subgenome contribution(s) by correcting the consensus  
590 results by the previously generated full likelihood approach results of Phylonet and plastome  
591 (CP) results (Supplementary Table S7). According to final results, we classified the origin of  
592 polyploids, and the number of subgenomes involved in polyploid formation.

593

#### 594 **SNP Discovery (RAD-Seq)**

595 To investigate post-origin evolution of allopolyploids in more detail ( $H_1$ – $H_6$ ,  $H_8$ , and  
596  $H_{10}$ ; Figs. 1, 3), we carried out SNIploid (vers. 17<sup>th</sup> March 2016; Peralta et al. 2013) analyses  
597 mainly following the workflow of Wagner et al. (2020) (see bash-script on Github). SNIploid  
598 compares the genome of an allotetraploid and a diploid putative parental species (DIPLOID2)  
599 with a diploid parental reference (DIPLOID1). The resulting SNPs were categorized: cat1&2  
600 result from post-origin interspecific hybridization, e.g., backcrossing to the parental species;  
601 cat3&4 represent post-origin lineage-specific SNPs (not present in the parents); cat5  
602 represents the homeo-SNPs from the hybrid origin from the two parents (Peralta et al. 2013;  
603 Wagner et al. 2020). For example, a first-generation-hybrid is expected to have only homeo-  
604 SNPs inherited from the parental species (cat 5), and no interspecific SNPs (cat 1,2) or  
605 derived SNPs (cat 3/4).

606 We created references of diploids by merging all accessions of a single progenitor  
607 species into a single \*.fastq file (all possible parental SNPs of genetically close individuals of  
608 a species have to be covered) and conducted within-sample clustering in IPYRAD (filtering  
609 and clustering settings identical to Karbstein et al. 2020b). Obtained consensus files were  
610 used as DIPLOID1 (reference) and merged \*.fastq files as DIPLOID2. We specified a  
611 minimum read depth per position of 20 (default; majority of positions showed more than 100  
612 reads coverage). First, we excluded the category ‘others’ (heterozygous positions of  
613 DIPLOID2) from final results. High percentages of this category (30–64%) are probably due  
614 to multi-sample accessions and high individual heterozygosity in natural diploid populations.  
615 To address the influence of ‘others’, we evaluated this category by splitting heterozygous  
616 positions (REF and ALT), and categorizing the remaining ALT SNPs of DIPLOID2 and REF  
617 SNPs of DIPLOID1 according to SNP categories of SNIploid. Moreover, we always observed  
618 a dominance of interspecific SNPs of cat2 compared with cat1 SNPs, independent of parental  
619 combination. This was probably due to neglect of natural genetic variation in the majority  
620 rule base call references. Therefore, we generally summarized both categories to ‘cat1&2’ to  
621 avoid biases within interspecific SNP categorization.  
622

623           **Results**

624           **Phylogenetic Tree Analyses unraveled Five Main Clades and showed Large**

625           **Congruence among Datasets**

626           For sexual and asexual *R. auricomus* individuals across Europe, we generated genomic  
627 RAD-Seq, nuclear target enrichment gene, and plastome (CP) data based on 97,312 loci (280  
628 individuals), 576 genes (113 individuals), and 71 regions (87 individuals), respectively. Both  
629 ML (RAD-Seq) and coalescent-based (nuclear genes) phylogenetic tree analyses revealed five  
630 main clades (I–V). BT support of tree ‘backbones’ was generally high (most FBP/TBE values  
631 90–100, Fig. 4a,b). Clades were well supported (FBP/TBE values 70–100), but particularly  
632 FBP support of clades IV and V for the ML (39–40 vs. 98–99 TBE support) and of clade V  
633 for the coalescent-based tree (27) was very low. Within clades, BT support was very low or  
634 absent (most FBP/TBE values 0–80/40–90; Supplementary Fig. S4a–c). Each clade contained  
635 one sexual species and polyploid taxa of various geographical origins (ML and ASTRAL  
636 taxon names, respectively): (I) *R. cassubicifolius* (subgenome C) with 13 and 16 tetra- and  
637 hexaploid samples, (II) *R. flabellifolius* (subgenome F) and with 4 and 6 tri- to hexaploid, (III)  
638 *R. marsicus* (subgenome M) and one tetra- to hexaploid, (IV) *R. notabilis* (subgenome N) and  
639 with 10 and 17 tetraploid, and (V) *R. envalirensis* (subgenome E) and with 21 and 40  
640 tetraploid taxa. Whereas clades I and II were predominantly characterized by undivided basal  
641 leaf types, clades III–IV exhibited only dissected ones.

**a) ML tree (RADseq)**

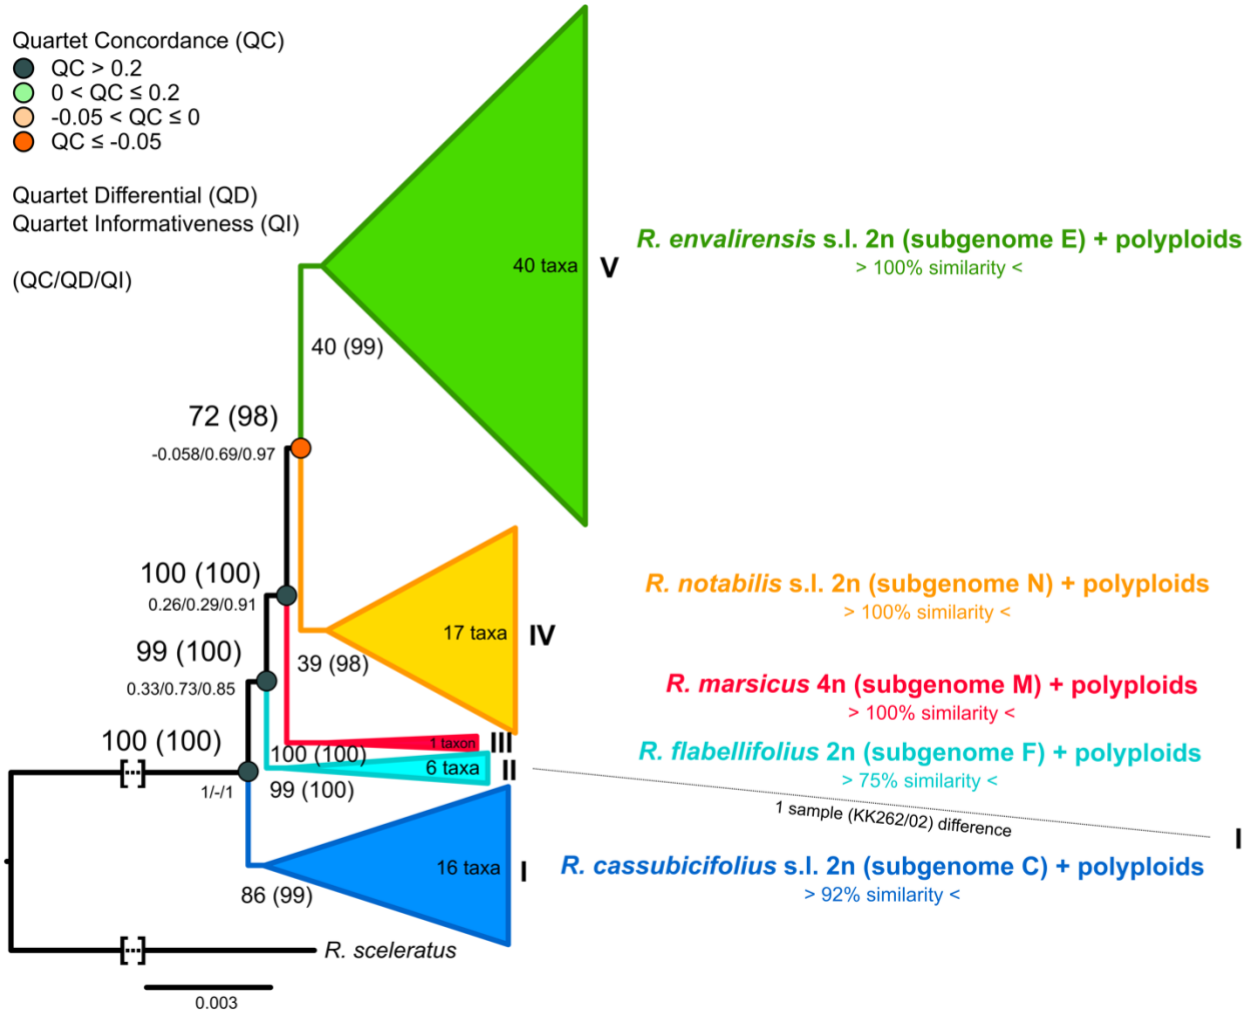

**b) Coalescent-based tree (target genes)**

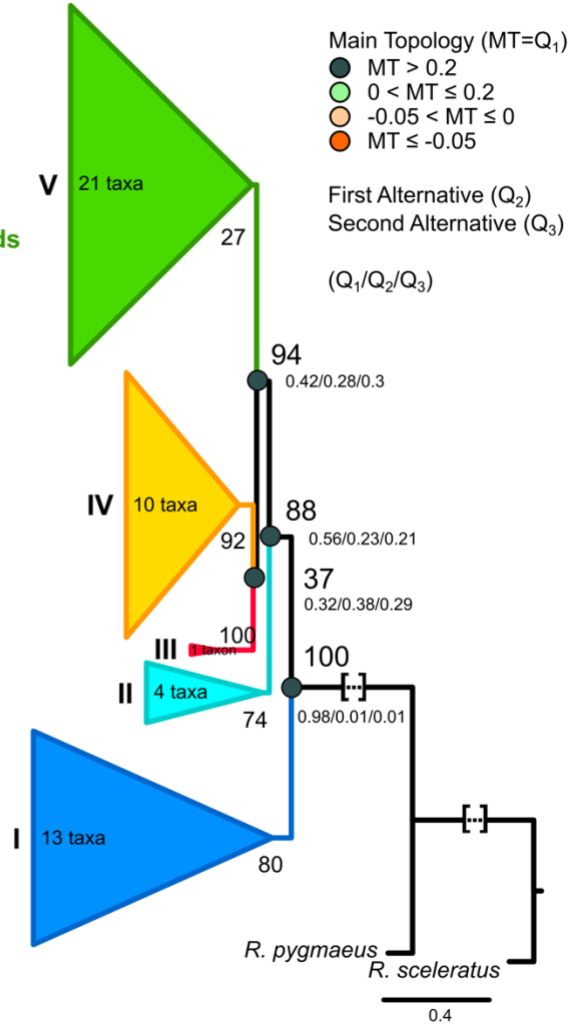

642

643 **Fig. 4**



644 ML tree nodes (RAD-Seq) were highly informative (QI=0.85–1, Fig. 4a). Quartet  
645 concordance metrics (QC) for RAD-Seq and main topology for target genes (MT=Q<sub>1</sub>) showed  
646 highly concordant patterns with almost no alternative topologies (QC=1, QD=-/MT=0.98,  
647 Q<sub>2</sub>=0.01, Q<sub>3</sub>=0.01, Fig. 4a,b) for the node splitting clade I and all remaining ones. All  
648 remaining nodes showed moderately to highly conflicting signals with varying distribution of  
649 alternative topologies (QC=-0.06–0.33, QD=0.29–0.73/MT=0.32–0.56, Q<sub>2</sub>=0.23–0.38,  
650 Q<sub>3</sub>=0.21–0.30), particularly the nodes splitting main clades IV and V (QC=-0.06)/M+N and E  
651 (MT=0.42), supported by lowered BT values (72–98). The sample composition of clades was  
652 highly similar between the different approaches.

653

#### 654 **Plastome Phylogeny showed Incongruences with Nuclear Data**

655 The ML tree based on plastome data (CP) revealed four well-supported main clades  
656 with FBP=100 (i.e., haplotype groups; Fig. 5a, Supplementary Fig. S12a–d). In general,  
657 within-clade (within-haplotype-group) relationships were mainly low or not supported (FBP  
658 <<70). Clade I consists of haplotypes from *R. cassubicifolius*, *R. flabellifolius*, and various  
659 polyploids. Within the first clade, accessions of *R. cassubicifolius* and *R. flabellifolius* were  
660 completely intermingled, contrary to nuclear datasets (Fig. 4). Clade II contained only  
661 haplotypes from polyploid taxa. The remnant two haplotype clades III and IV consisted of  
662 *R. envalirensis* and few polyploid accessions, and *R. notabilis*, *R. marsicus*, and various  
663 polyploids, respectively. Interestingly, accessions of the diploid *R. notabilis* and the tetraploid  
664 *R. marsicus* are intermingled, indicating that they belong to the same haplotype group  
665 (Supplementary Fig. S12b), contrary to nuclear data (Fig. 4). The splitsgraph of the neighbor-  
666 net analysis also exhibited four, weakly differentiated, clusters (Fig. 5b, Supplementary Fig.  
667 S13). The same is true for the TCS haplotype network (Supplementary Fig. S14).

a)

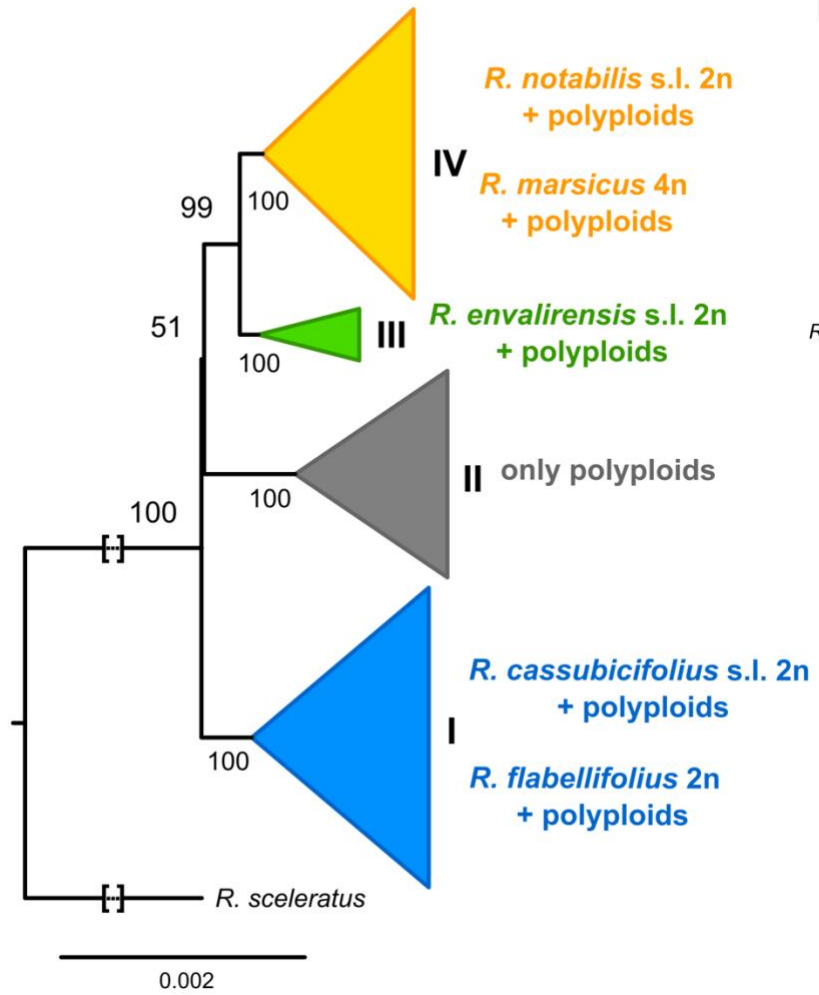

b)

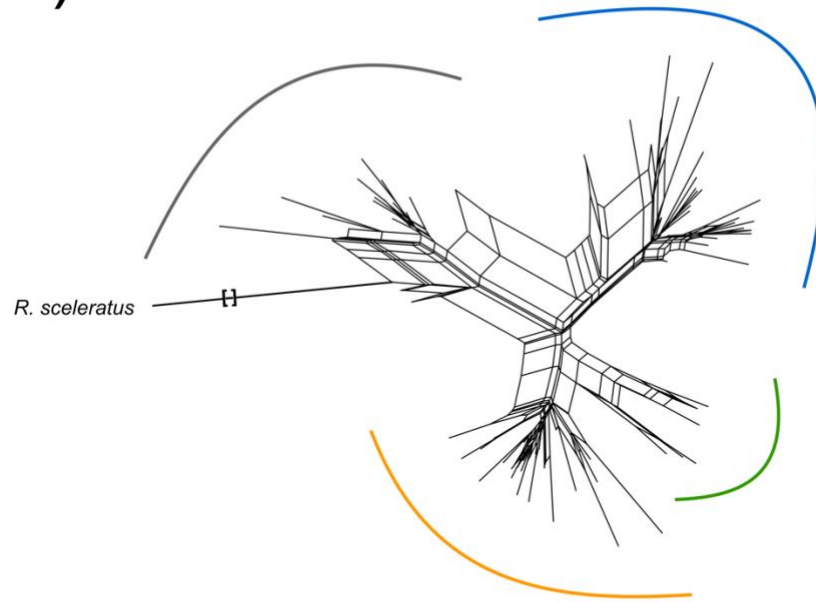

668

669 Fig. 5

670           **Genetic Structure Analyses indicated 3-5 Clusters, strong Reticulation, and a**  
671           **Geographical Pattern**

672           Structure analyses based on RADpainter+fineRADstructure revealed three supported  
673 main clusters (Fig. 6a). Sexual species were also clustered with polyploids: (I)  
674 *R. cassubicifolius* (C) and tetra- to hexaploid taxa, (II) *R. flabellifolius*, *R. marsicus*, and  
675 *R. notabilis* (F, M, and N) and tri- to hexaploid taxa, and (III) *R. envalirensis* (E) and  
676 tetraploid taxa. Commonly, polyploids showed high coancestry values, i.e., orange to red  
677 colors, with different clusters indicating reticulation events (see particularly polyploids H<sub>1</sub>-  
678 H<sub>10</sub>). In addition, highest values were found in relation to the sexual subgenomes occurring in  
679 the same cluster (Supplementary Table S7). Polyploids of cluster I showed highest similarity  
680 values with C and lowest ones with N and F. In contrast, cluster II is genetically more  
681 heterogeneous (subclusters IIa, IIa). Polyploids shared high similarity values with N and low  
682 coancestry values with F, E, and C. In cluster III, polyploids only exhibited high similarity to  
683 E.

684           Structure analysis based on STACEY revealed similar results (Fig. 6b, Supplementary  
685 Table S7). Sexuals are also surrounded by polyploids, and polyploids showed several  
686 reticulations and highest posterior probabilities with intra-cluster sexual subgenomes. There  
687 are few differences here: the former cluster II is divided into three distinct clusters each  
688 containing a single sexual species (II-IV), and many polyploids of the former cluster IIa are  
689 incorporated into cluster V. In addition, polyploids of cluster I also revealed significant  
690 posterior probabilities to E, and polyploids of cluster V to F, C, and N. In general, subgenome  
691 M shared no significant coancestry/posterior probability values with polyploids.

692           Structure analyses based on sNMF also unraveled three to four (up to five) main  
693 clusters (Fig. 7a-d, Supplementary Figs. S6-11, S15).

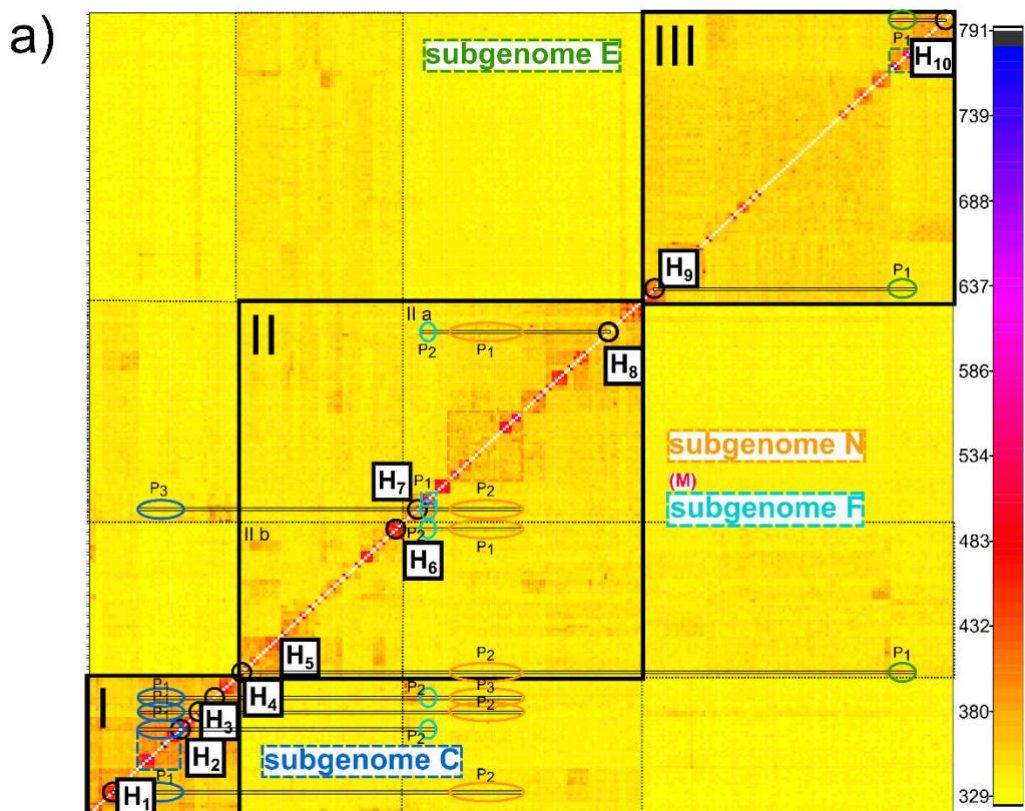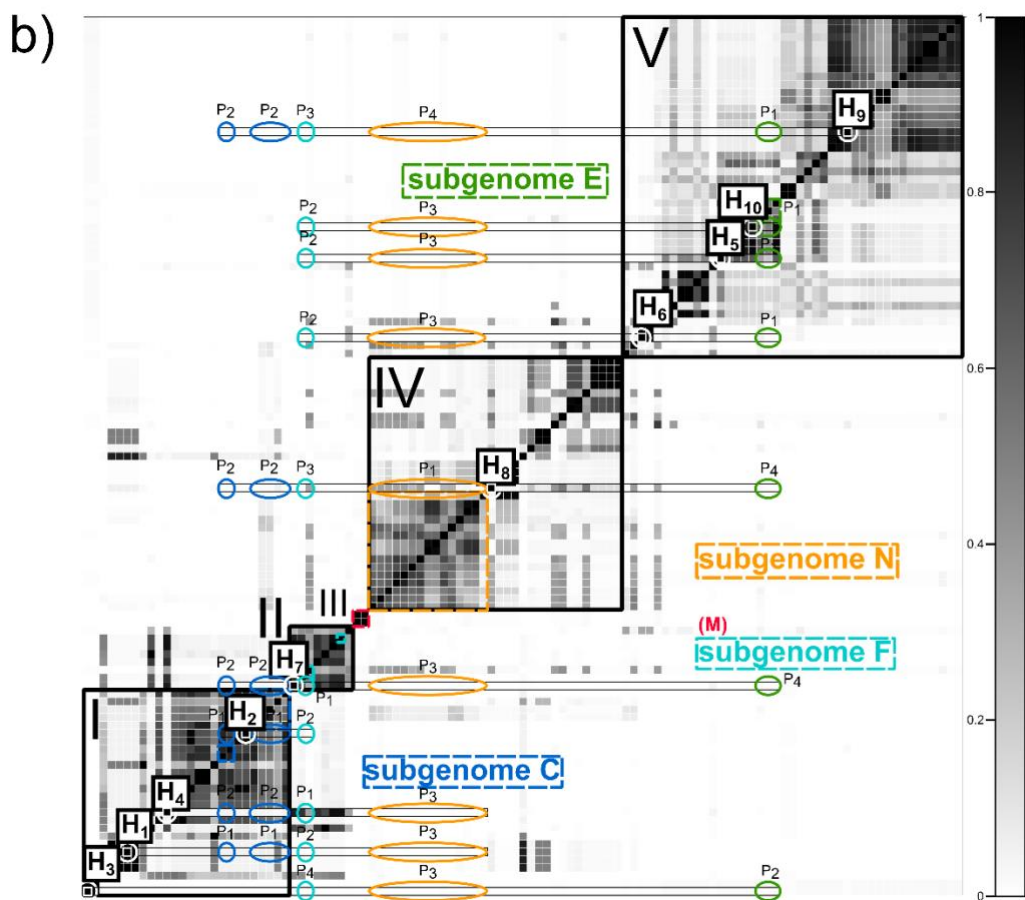

694

695 **Fig. 6**

696 Although polyploids were characterized by a dominant genetic partition, they also showed 1–  
697 3 minor genetic partitions (Fig. 7b,d, Supplementary Fig. S7a–c). The likeliest number of K  
698 (clusters), K=3, showed a west-east distribution of clusters across Europe (Fig. 7a,c). The  
699 clusters themselves are north-south distributed. *Ranunculus envalirensis* and related  
700 polyploids (E, green partition) mainly inhabit regions in southwestern, central, and northern  
701 Europe. *Ranunculus flabellifolius*, *R. marsicus*, and *R. notabilis* and related polyploids (F, M,  
702 and N, orange partition) predominantly occupy southern, central-eastern, and northern  
703 Europe. *Ranunculus cassubicifolius* and related polyploids (C, blue partition) range from  
704 southeastern to northern Europe, including a disjunct distribution in central Europe. When  
705 comparing results of K=3 and K=4, the only remarkable difference is the emergence of a  
706 genetic cluster in central and northern Europe without a sexual species (grey partition) out of  
707 the former green one (Fig. 7a,c). In general, sNMF results are comparable to all previous  
708 analyses (grey partition predominantly found in clade V (Fig. 4a,b)/cluster III (Fig. 6a)/cluster  
709 V (Fig. 6b), and the orange partition mostly situated in clade II–IV (Fig. 4a,b)/cluster III (Fig.  
710 6a)/cluster II–IV (Fig. 6b). The splitsgraph of the neighbor-net analysis (RAD-Seq) also  
711 exhibited three main genetic clusters weakly differentiated from each other (Supplementary  
712 Figs. S16a and Fig. 6a).

713

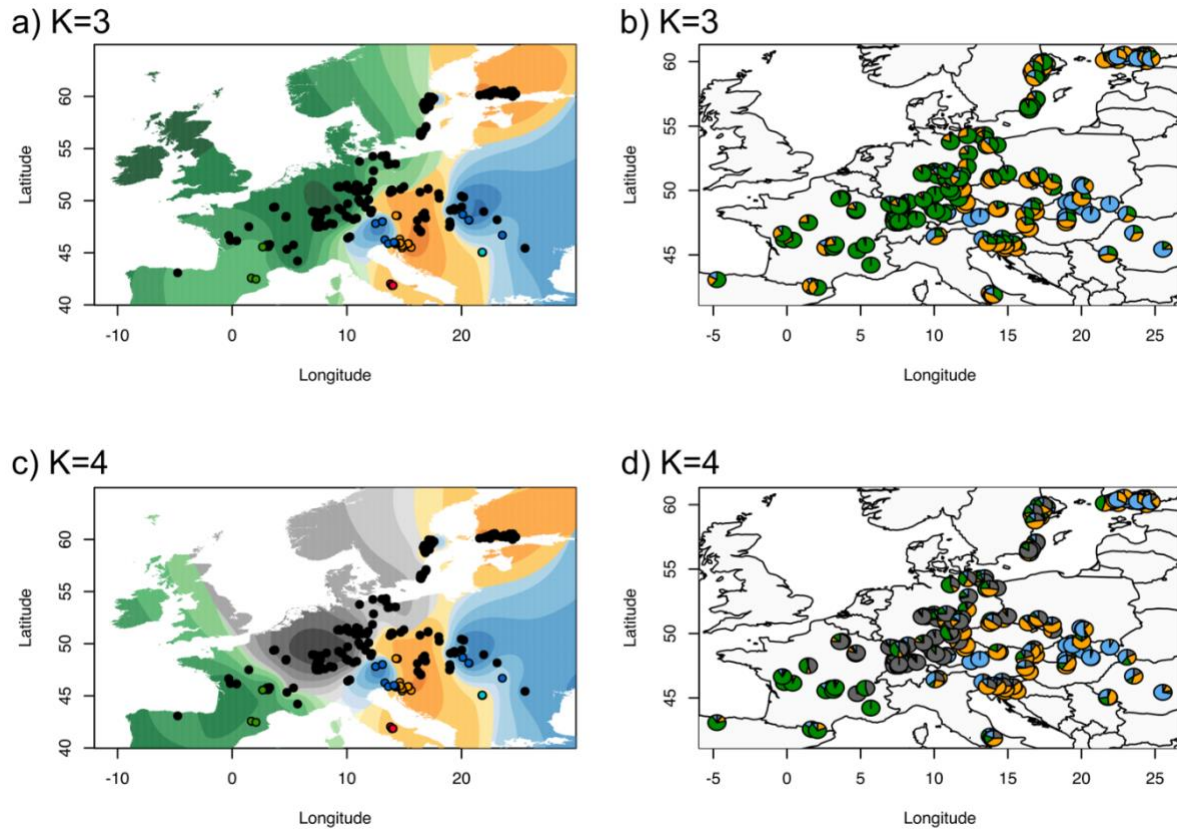

714

715 **Fig. 7**

716

717 **Phylogenetic Networks supported by Genetic Structure revealed Allopolyploidy,**  
718 **2-3 Contributing Subgenomes, and Subgenome Dominance**

719 For most tested polyploids, phylogenetic networks based on RAD-Seq and target

720 enrichment datasets showed two different subgenome contributions (Figs. 8a–h, 9, Tables 1,

721 Supplementary Table S7). These polyploids were usually characterized by a dominant

722 ( $P_1=51\text{--}99\%$ , mean 74%) and a minor subgenome contribution ( $P_2=1\text{--}49\%$ , mean 26%).

723 Concerning PhyloNet likelihood+AIC calculations, reticulate evolution and thus allopolyploid

724 origin was confirmed in most cases ( $H_1\text{--}H_6$ ,  $H_8$ , and  $H_{10}$ ). Within clade I and cluster I (Figs. 4,

725 6), polyploids  $H_1\text{--}H_4$  possessed the dominant subgenome C whereas minor ones came from F

726 followed by E and N. The blue haplotype C+F of these polyploids matched the dominant

727 subgenome C. Final results indicated that '*R. × platycarpoides*' ( $H_1$ ) is composed of

728 subgenomes C and N, '*R. × elatior*' (H<sub>2</sub>) of C and F, '*R. × pseudocassubicus*' (H<sub>3</sub>) of C and  
729 E, and '*R. × hungaricus*' (H<sub>4</sub>) of C and F.

730 Moreover, we inferred varying subgenome contributions for the polyploid  
731 '*R. × pilisiensis*' (H<sub>7</sub>) of clade II (Fig. 4a,b) and cluster II/III (Fig. 6a/b), but consensus results  
732 supported by CP results revealed subgenome F as the dominant one. The likeliest scenario is a  
733 tree-like evolution (autopolyploid origin). The polyploid '*R. × indecorus*' (H<sub>8</sub>), positioned in  
734 clade IV (Fig. 4a,b) and cluster II/IV (Fig. 6a/b), showed three subgenomes, whereas N was  
735 the slightly dominant one, and C and N the minor ones. '*Ranunculus × fissifolius*' (H<sub>5</sub>) was  
736 characterized by the orange haplotype N and is also composed of three different subgenomes  
737 (E, F, and N).

738 The polyploids '*R. × glechomoides*' (H<sub>6</sub>), '*R. × subglechomoides*' (H<sub>9</sub>), and  
739 '*R. × leptomeris*' (H<sub>10</sub>) exhibited subgenome E as the dominant contribution. In most tree and  
740 genetic structure analyses, these polyploids were also situated close to E. CP analyses showed  
741 the green haplotype E for H<sub>6</sub> and H<sub>10</sub>, but not for H<sub>9</sub>. Final results indicated E and F  
742 subgenome contributions for H<sub>6</sub> and H<sub>10</sub>. '*Ranunculus × subglechomoides*' (H<sub>9</sub>) exhibited the  
743 grey, unknown haplotype U and Phylonet AIC+likelihood calculations detected similarly-  
744 likely scenarios of reticulate (E and F) or tree-like evolution (E) (Table 1, Fig. 9).

745

Table 1.

| Analysis                    | H <sub>1</sub><br><i>'R. x platycarpoides'</i> |                |                |  | H <sub>2</sub><br><i>'R. x elatior'</i> |                |                |                | H <sub>3</sub><br><i>'R. x pseudocassubicus'</i> |                |                |                | H <sub>4</sub><br><i>'R. x hungaricus'</i> |                |                |                | H <sub>5</sub><br><i>'R. x fissifolius'</i> |                |                | H <sub>6</sub><br><i>'R. x glechomoides'</i> |                |                | H <sub>7</sub><br><i>'R. x pilisiensis'</i> |                |                |                | H <sub>8</sub><br><i>'R. x indecorus'</i> |                |                |                | H <sub>9</sub><br><i>'R. x subglechomoides'</i> |                |                |                | H <sub>10</sub><br><i>'R. x leptomeris'</i> |   |   |   |  |  |  |  |  |
|-----------------------------|------------------------------------------------|----------------|----------------|--|-----------------------------------------|----------------|----------------|----------------|--------------------------------------------------|----------------|----------------|----------------|--------------------------------------------|----------------|----------------|----------------|---------------------------------------------|----------------|----------------|----------------------------------------------|----------------|----------------|---------------------------------------------|----------------|----------------|----------------|-------------------------------------------|----------------|----------------|----------------|-------------------------------------------------|----------------|----------------|----------------|---------------------------------------------|---|---|---|--|--|--|--|--|
|                             | P <sub>1</sub>                                 | P <sub>2</sub> | P <sub>3</sub> |  | P <sub>1</sub>                          | P <sub>2</sub> | P <sub>3</sub> | P <sub>4</sub> | P <sub>1</sub>                                   | P <sub>2</sub> | P <sub>3</sub> | P <sub>4</sub> | P <sub>1</sub>                             | P <sub>2</sub> | P <sub>3</sub> | P <sub>4</sub> | P <sub>1</sub>                              | P <sub>2</sub> | P <sub>3</sub> | P <sub>1</sub>                               | P <sub>2</sub> | P <sub>3</sub> | P <sub>4</sub>                              | P <sub>1</sub> | P <sub>2</sub> | P <sub>3</sub> | P <sub>4</sub>                            | P <sub>1</sub> | P <sub>2</sub> | P <sub>3</sub> | P <sub>4</sub>                                  | P <sub>1</sub> | P <sub>2</sub> | P <sub>3</sub> |                                             |   |   |   |  |  |  |  |  |
| <b>consensus results</b>    | C                                              | N              | F              |  | C                                       | F              |                |                | C                                                | E              | F              | N              | C                                          | F              | N              |                | E                                           | E              | N              | E                                            | F              | N              | F                                           | F              | C              | E              | N                                         | C              | F              | E              | E                                               | E              | C              | F              | N                                           | E | E | N |  |  |  |  |  |
| <b>likel+AIC (PhyloNet)</b> | reticulate (N, C)                              |                |                |  | reticulate (C, F)                       |                |                |                | reticulate C=E)                                  |                |                |                | reticulate (F, C > C, C)                   |                |                |                | reticulate (3x E, F)                        |                |                | reticulate (E, F)                            |                |                | tree-like (F)                               |                |                |                | reticulate (E, C > N, C)                  |                |                |                | reticulate (E, F) > tree like (E)               |                |                |                | reticulate (E, F)                           |   |   |   |  |  |  |  |  |
| <b>CP type</b>              | C/F                                            |                |                |  | C/F                                     |                |                |                | C/F                                              |                |                |                | C/F                                        |                |                |                | N*                                          |                |                | E                                            |                |                | C*/F*                                       |                |                |                | N                                         |                |                |                | U#                                              |                |                |                | E                                           |   |   |   |  |  |  |  |  |
| <b>final results</b>        | C                                              | N              |                |  | C                                       | F              |                |                | C                                                | E              |                |                | C                                          | F              |                |                | E                                           | F              | N              | E                                            | F              |                |                                             | F              |                |                |                                           | N              | C              | E              |                                                 | E(U)           | (F)            |                |                                             | E | F |   |  |  |  |  |  |
| <b>genome evolution</b>     | allo                                           |                |                |  | allo                                    |                |                |                | allo                                             |                |                |                | allo                                       |                |                |                | allo                                        |                |                | allo                                         |                |                | auto                                        |                |                |                | allo                                      |                |                |                | allo vs. auto                                   |                |                |                | allo                                        |   |   |   |  |  |  |  |  |
| <b>no. sub-genome/s</b>     | 2                                              |                |                |  | 2                                       |                |                |                | 2                                                |                |                |                | 2                                          |                |                |                | 3                                           |                |                | 2                                            |                |                | 1                                           |                |                |                | 3                                         |                |                |                | 1-2                                             |                |                |                | 2                                           |   |   |   |  |  |  |  |  |

746



747 **Post-origin Genome Evolution of Allopolyploids is shaped by Interspecific Gene**

748 **Flow**

749 SNP discovery (SNiPloid) based on RAD-Seq data supported allopolyploid hybrid  
750 origins with 3–33% (9–36% with evaluated others) homeo-SNPs of cat5. Whereas polyploids  
751 H<sub>1</sub>, H<sub>3</sub>, and H<sub>4</sub> showed relatively high percentages of homeo-SNPs (>20%), the polyploids  
752 H<sub>2</sub>, H<sub>4</sub>–H<sub>10</sub> exhibited low amounts (<15%). The majority of SNPs, however, indicated  
753 considerable post-origin evolution of allopolyploids (Fig. 8a–h, Supplementary Table S8).  
754 Across datasets, SNiPLoid assessed 64–93% (62–89% with evaluated ‘others’) interspecific  
755 SNPs of cat1&2, and 3–5% (2–3%) derived SNPs of cat3/4. Interspecific SNPs of cat1&2  
756 were lowest for polyploids H<sub>1</sub>, H<sub>3</sub>, and H<sub>4</sub> and highest for H<sub>2</sub>, H<sub>4</sub>–H<sub>10</sub>.

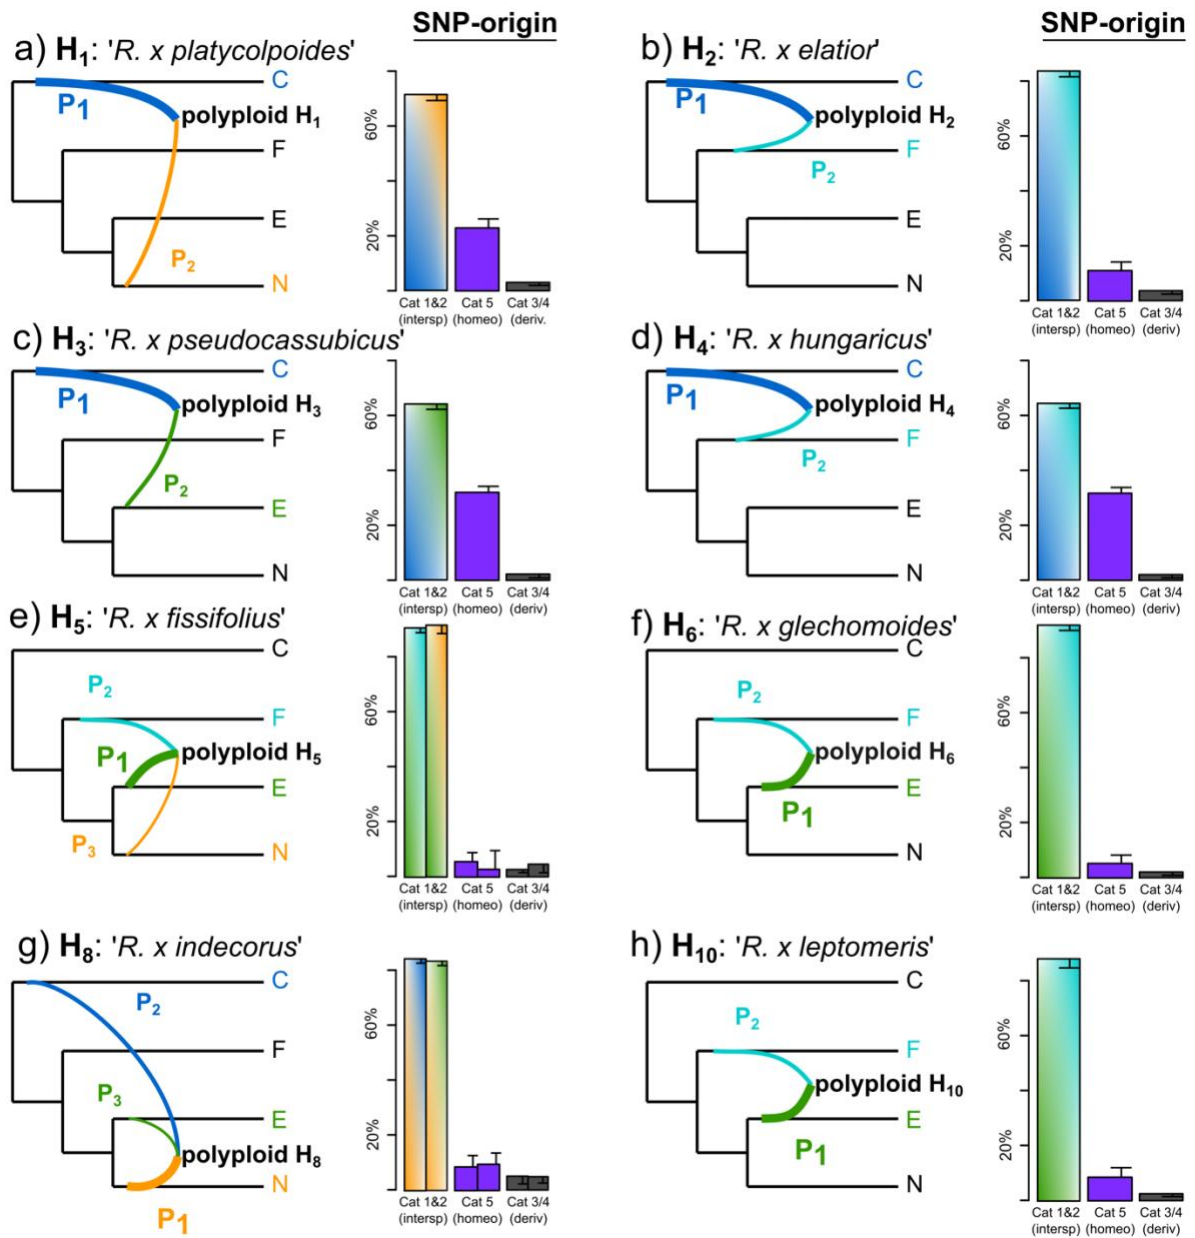

757

758 **Fig. 87**

759

760           **Discussion**

761           Polyploid phylogenetics is an emerging and bioinformatically challenging field, with  
762 important consequences for understanding plant speciation and macroevolution (Soltis et al.  
763 2015; Landis et al. 2018; Rothfels 2021). Here, we used a comprehensive genomic, nuclear  
764 gene, and plastome dataset to unravel evolutionary processes of a less than 1 Mya polyploid  
765 species complex. Different kinds of evidence included in our self-developed bioinformatic  
766 pipeline confirmed that hybridization of sexual progenitors followed by polyploidization  
767 (allopolyploidy) is the dominant formation type in our model system (Table 1).  
768 Allopolyploidy also shaped the evolution of many other young polyploid complexes (Sochor,  
769 2015; Spoelhof et al. 2017; Dauphin et al. 2018; Rothfels 2021). In addition, we also  
770 demonstrated remarkable post-origin genome evolution of allopolyploids, mostly due to  
771 interspecific gene flow. The bioinformatic pipeline presented here disentangled the parental  
772 contributions and the genomic diversity and composition of different polyploid apomictic  
773 lineages that have evolved. The *Ranunculus auricomus* model system is the first well-studied,  
774 large polyploid European species complex using OMICS data. The major conceptual  
775 breakthrough presented here is the combination of several datasets and up-to-date NGS  
776 methods into a new pipeline, starting with the diploid progenitors and ending up with the  
777 polyploid derivatives, to receive, for the first time, a complete picture of the evolution of a large  
778 polyploid complex. The novel aspects particularly comprise network analyses, consensus  
779 result making of previous structure and network results, and auto- vs. allopolyploid testing.

780

781           **The Phylogenetic Pattern**

782           Phylogenetic trees based on RAD-Seq and nuclear gene data surprisingly revealed  
783 only five well-supported main clades (Fig. 4a,b). Congruence between data sets hints at a  
784 strong evolutionary signal regardless of analyzing anonymous genomic regions (RAD-Seq) or

785 only coding nuclear genes, and regardless of applying different analytical approaches  
786 (concatenation and ML vs. coalescence). Since the two marker sets complete each other to  
787 some extent (see Materials & Methods), we infer a robust phylogenetic framework for all  
788 further analyses.

789 Each main clade contained a sexual species surrounded by asexual polyploid lineages,  
790 showing that polyploids largely derived from their clade-specific progenitors (Fig. 4). This  
791 pattern is rather unique compared with other polyploid complexes, where usually clades with  
792 several diploid and (allo)polyploid taxa, but also clades with only polyploids were found  
793 (Kirschner et al. 2015; Dauphin et al. 2018; Carter et al. 2019; Wagner et al. 2020). Despite  
794 well-supported tree backbones according to BT values and highly informative branches (Fig.  
795 4a), quartet support is partly low and distribution of alternative topologies (QD, Q's; Fig. 4)  
796 hints at both inter-clade reticulation and ILS. Particularly within main clades, BT values are  
797 extremely low and quartet support metrics (QD, Q's) indicate high rates of introgression and  
798 ILS signals (Supplementary Figs. S3, S4). Concerning the ML tree, TBE support was,  
799 especially at the backbone, higher than BT support probably due to less sensitivity of TBE to  
800 hybridization events and 'jumping taxa' (Lemoine et al. 2018). Reticulate evolution at the  
801 backbone of the tree is further indicated by the incongruent position of F polyploid derivatives  
802 in the plastid tree compared with the nuclear trees. The placement of diploid *R. flabellifolius*  
803 within the *R. cassubicifolius* plastid clade contrary to the nuclear trees suggests that *R.*  
804 *flabellifolius* could be an ancient homoploid hybrid species.

805 Within these main clades, the majority of described polyploid morphospecies are non-  
806 monophyletic (Supplementary Figs. S1–S4a–c). No clear clade-/group-specific morphological  
807 trend is recognizable (Figs. 4–9), except that taxa with undivided basal leaves were mainly  
808 found in clades I+II. This incongruence with morphology also rejects the old Linnaean  
809 classification of two main morphotypes (previously also rejected for sexual progenitors in

810 Karbstein et al. 2020b). Network-like evolution through hybridization (allopolyploidy) is  
811 well-known to cause severe conflicting signals in tree reconstructions (Lemoine et al. 2018;  
812 Pease et al. 2018; Rothfels 2021). Moreover, cladogenetic speciation of *R. auricomus*  
813 allopolyploids from common polyploid ancestors is unlikely. Cladogenetic speciation would  
814 lead to bifurcating, tree-like post-origin evolution and thus only low conflicting signals (Jones  
815 2017a) at middle and terminal branches. Here, these branches are extremely conflicting,  
816 suggesting extensive and repeated reticulate polyploid formation events. In contrast,  
817 coalescent-based phylogenetic analyses in the 20 Mya genus *Rubus* detected varying main  
818 clade positions, but highly resolved relationships within each clade (Carter et al. 2019). In  
819 brambles, ancient polyploidization events, strong geographical structure between continents,  
820 clade-specific and rather less post-origin evolution might explain this pattern. In  
821 *R. auricomus*, repeatedly ongoing hybridization and/or polyploidization of sexual progenitors  
822 during Pleistocene climate fluctuations in Europe and partly high facultative sexuality of  
823 polyploid apomicts in central and southern regions (Tomasello et al. 2020; Karbstein et al.  
824 2021) potentially led to highly conflicting phylogenetic signals at middle and terminal  
825 branches.

826

### 827 **Genetic Structure, Origin, and Parentage of Polyploids**

828 Genetic structure also revealed 3–5 main clusters (Fig. 6), largely fitting the phylogenetic  
829 main clades. We detected more reticulation signals in RAD-Seq data, probably favored by the  
830 incorporation of all SNPs of 97,312 loci, maximizing the information for analyzing young  
831 plant complexes. In contrast, analyses based on nuclear genes better inferred genetic  
832 boundaries by splitting each sexual progenitor species and accompanying polyploids into  
833 separate clusters. This advantage is probably related to the coalescent-based species  
834 delimitation using allelic information of the 48 phased loci (Jones 2017b; Karbstein et al.

835 2020b; Tomasello et al. 2020). Interestingly, we observed a west-east distribution of clusters  
836 within Europe (Fig. 7a, see also Karbstein et al. 2020b, 2021): a western cluster related to  
837 *R. envalirensis* (E), a central cluster related to *R. flabellifolius*, *R. marsicus*, and *R. notabilis*  
838 (F, M, and N), and an eastern cluster related to *R. cassubicifolius* (C), each ranging from  
839 southern to northern Europe, respectively. West-east allopatric speciation of sexual  
840 progenitors in combination with both allopolyploidization events and north-south migration of  
841 populations due to past climatic changes may explain this pattern (Abbott et al. 2013;  
842 Tomasello et al. 2020). Moreover, we detected a subdivision of the western cluster (green,  
843 Fig. 7c,d). The grey, central European subcluster widely corresponds to the grey ‘polyploid-  
844 only’ haplotype of the ML plastid tree (Fig. 5a). The fact that ploidy levels of *R. auricomus*  
845 populations in central Europe are well-studied (Jalas and Sumoninen 1989; Paule et al. 2018;  
846 Karbstein et al. 2021) makes it unlikely that an extant diploid was simply overlooked.  
847 Moreover, some polyploids possess a plastid type from an unknown diploid, suggesting an  
848 already extinct sexual progenitor related to subgenome E. Extinction of sexuals is a  
849 commonly considered or observed phenomenon in young polyploid complexes shaped by past  
850 climatic deteriorations (Sochor et al. 2015; Rothfels 2021) and is supported here by missing  
851 speciation events between 0.6 and 0.3 Ma (Million-years-ago; Tomasello et al. 2020).  
852 Alternatively, extinction could be due to past human activity.

853 Both genetic structure and phylogenetic network results based on RAD-Seq and  
854 nuclear gene data revealed that the majority of polyploids were composed of two, surprisingly  
855 some of three, subgenome contributions (Figs. 6, 8, 9, Table 1). Plastome data underlined  
856 inferred subgenome contributions. We detected only one polyploid, that didn’t show evidence  
857 of a reticulate evolutionary history: ‘*R. × pilisiensis*’ (H7). Here, varying subgenome  
858 contributions were found (Fig. 6, Table 1), but network analyses suggested autopolyploid  
859 origin from progenitor subgenome F. This lineage might also represent a segmental

860 allopolyploid, as auto- and allopolyploidy are connected by transitions (Comai 2005;  
861 Spoelhof et al. 2017). Autotetraploid cytotypes are also known from the otherwise diploid  
862 sexual species *R. cassubicifolius* (Hörandl and Greilhuber 2002). However, autopolyploidy is  
863 currently only present in the *R. auricomus* complex in clades/clusters I and II, supporting its  
864 probably less frequent occurrence compared with allopolyploidy in nature (Spoelhof et al.  
865 2017; but see many unnamed autopolyploids in Barker et al. 2015).

866 All diploid sexual progenitors were involved in allopolyploid formation (C, F, N, E,  
867 and U; Fig. 9). Polyploids were probably formed multiple times out of different progenitor  
868 combinations followed by considerable post-origin evolution. Close crosses result more easily  
869 in homoploids, whereas distant ones tend to become rather allopolyploid (Soltis and Soltis  
870 2009). However, we observed allopolyploids out of genetically distant (C+N, N+C+E),  
871 moderate (C+E, E+F+N), and close (C+F, E+F) crosses. Extant homoploid hybridization is  
872 probably inhibited by the allopatric distribution of sexual species (see Tomasello et al. 2020).  
873 Interestingly, allopolyploids showed more meiotic errors than homoploid hybrids in  
874 experimental crossings (distant C+N *R. auricomus* crosses; Barke et al. 2020). However,  
875 polyploids can escape hybrid sterility via apomixis, vegetative reproduction, and/or selfing  
876 (Hörandl 2006; Soltis and Soltis 2009; Barke et al. 2018, 2020).

877

878

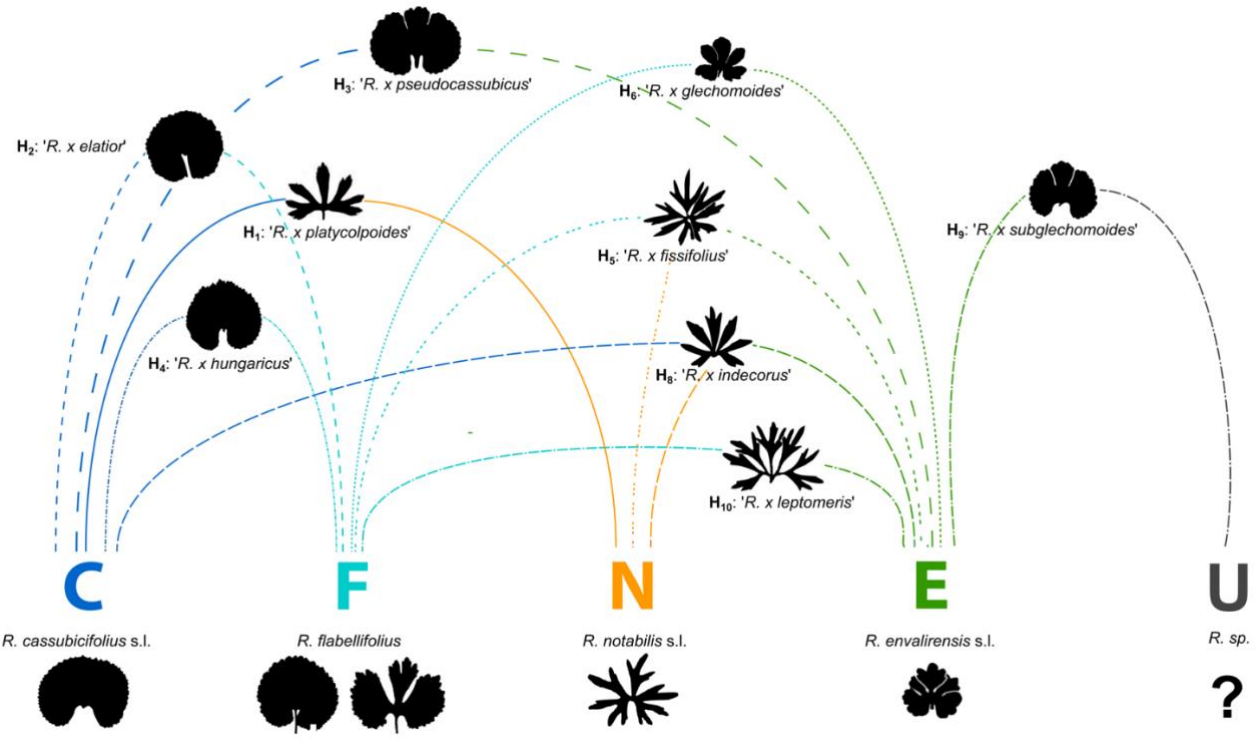

Fig. 9



882 Extant sexuals have restricted ranges and are separated by thousands of kilometers  
883 across Europe (Fig. 2). Nevertheless, all main genetic clusters are present in central Europe  
884 (Fig. 7a, c). Sexual progenitors might have repeatedly met in this region during past  
885 interglacial times, giving rise to multiple allopolyploidization ‘waves’ with varying  
886 subgenome contributions. Interestingly, polyploids composed of three different subgenomes  
887 were only found in Central Europe and South Sweden (H<sub>5</sub>, H<sub>8</sub>), underlining the importance of  
888 secondary contact zones for the allopolyploid origin of the *R. auricomus* complex.

889 The genetic and phenotypic diversity of *R. auricomus* biotypes with more than 840  
890 described morphospecies is probably formed by multiple allopolyploidization events from  
891 four extant and at least one probably extinct diploid, sexual progenitor species. Other studies  
892 already demonstrated that few diploid progenitors were capable of producing a magnitude of  
893 allopolyploids, for example in *Botrychium* (Dauphin et al. 2018), *Rubus* (Sochor et al. 2015;  
894 Carter et al. 2019), or *Taraxacum* (Kirschner et al. 2015).

895

### 896 **Post-Origin Evolution: Subgenome dominance, Hybridization, and Mutation**

897 Subgenome dominance was inferred in almost all tested allopolyploids and resulted in  
898 74% mean inheritance probabilities from network analyses (Figs. 6, 8, 9, Table 1). Per main  
899 genetic cluster, allopolyploids were usually composed of dominant intra-cluster subgenomes  
900 and 1(-2) minor, varying inter-cluster subgenome(s), although trigonomic polyploids showed  
901 rather similar contributions (supported by SNP-origin analyses; Figs. 6, 8). Plastid data  
902 supported the dominant subgenome contribution and, in some cases, unraveled an additional  
903 or unknown/extinct subgenome (Table 1). Sequence subgenome dominance probably leads to  
904 the grouping of polyploids close to the dominant progenitor (Figs. 4, 6). Hence, polyploids of  
905 cluster I, II (II–IV), and III probably received at least one subgenome from C, N, and E(-like)  
906 progenitor lineages.

907 Subgenome dominance is a common feature of allopolyploids (Blischak et al. 2018;  
908 Alger and Edger 2020). Here, segregation after hybridization, and after polyploidization, gene  
909 flow due to facultative sexuality of apomicts might cause the observed dominance. We  
910 consider biased fractionation of minor importance regarding the less than 1 Mya or even  
911 younger *R. auricomus* polyploids. For example, similar old *Brachypodium hybridum* showed  
912 only gradual gene loss and no subgenome expression dominance 1.4 million years after  
913 allopolyploidization (Gordon et al. 2020). The importance of diploid hybrid segregation and  
914 post-origin gene flow due to facultative sexuality is highlighted by SNIploid analyses. We  
915 detected only a minority of SNPs from hybridogenic origins (3–36%), but considerable  
916 proportions of interspecific, post-hybridization SNPs (62–93%). Since apomixis establishes  
917 only stepwise, the first diploid hybrid generations still exhibit predominant sexual  
918 reproduction (Barke et al. 2018), allowing for Mendelian segregation. The potential of  
919 Mendelian segregation in early hybrid generations for creating the nearly complete extant  
920 morphological diversity of the complex was demonstrated experimentally by Barke et al.  
921 (2018) and Hodač et al. (2018).

922 Moreover, facultative sexuality and maintenance of functional pollen probably  
923 allowed the newly formed hybrids for backcrossing with their parental species, and among  
924 each other. Extant polyploids under natural conditions exhibit usually low, but varying  
925 degrees of facultative sexuality (mean 2.15%, range 0–34%; Karbstein et al. 2021). Relatively  
926 high sexuality values of central and southern European asexual populations may indicate  
927 some ongoing gene flow. For example, in apomictic *Rubus* or *Pilosella* polyploids, which are  
928 also characterized by highly variable, facultative sexuality, post-origin scenarios by  
929 interlineage gene flow and backcrossing to sexual parents have also been considered (Sochor  
930 et al. 2015; Hörandl 2018; Nardi et al. 2018; Carter et al. 2019). However, processes of fast  
931 segregation with backcrossing before vs. gene flow after polyploidization cannot be

932 distinguished here, but we recognize here post-origin genome evolution as an important factor  
933 shaping genome structure of polyploids.

934         Only a few morphospecies appeared as monophyletic groups (e.g., H<sub>2</sub>, H<sub>6</sub>, H<sub>7</sub>; see also  
935 Supplementary Figs. S1–S3) and are evolving towards more stable lineages. The original  
936 hypothesis of Babcock and Stebbins (1938) predicted that such lineages would only form at  
937 higher ploidy levels (>6*n*, see Fig. 1). However, already Grant (1981) recognized that  
938 formation of stable apomictic lineages in a ‘mature complex’ is less dependent on cytotype  
939 but rather correlated to age, loss of sexuality, and extinction of sexual progenitors. According  
940 to Grant’s (1981) definition, the *R. auricomus* complex is in an early mature stage of  
941 evolution, with extant diploid progenitors and a broad array of apomictic biotypes. This  
942 hypothesis is confirmed by the low proportion of lineage-specific SNPs (Fig. 8). SNP origin  
943 analyses revealed only 2–5% derived SNPs in allopolyploids attributable to mutations (Welch  
944 and Meselson 2000; Pellino et al. 2013). Low degrees of post-origin sequence evolution are  
945 not surprising when comparing the evolutionary young *R. auricomus* polyploids to similar-old  
946 or older allopolyploids (Pellino et al. 2013; Gordon et al. 2020; Tomasello et al. 2020;  
947 Wagner et al. 2020). For example, several million years old *Salix* sexual allopolyploids  
948 exhibited 19–47% post-origin, species-specific SNPs (Wagner et al. 2020).

949

## 950 **Integration of Datasets and Analyses for unraveling Evolutionary Processes in Young** 951 **Polyloid Complexes**

952 Our case study demonstrates that even with OMICS approaches it is useful to rely on different  
953 complementary reduced-representation datasets to tackle polyloid complexes: genomic  
954 RAD-Seq, nuclear genes, and plastomic regions. On the one hand, RAD-Seq provided the  
955 highest number of (allelic) information (loci and SNPs) both from non-coding and coding  
956 regions. On the other hand, correct allele phasing and discrimination of homoeologues is

957 desirable for polyploids (Eriksson et al. 2018; Freyman et al. 2020; Lautenschlager et al.  
958 2020; Rothfels 2021) but still a challenge for non-model plants. Both datasets together  
959 represent well the nuclear genome and can be much easier collected, cheaper sequenced, and  
960 easier analyzed for a large number of samples than entire transcriptomes or genomes (McKain  
961 et al. 2018; Johnsen et al. 2019). Moreover, target enrichment even allows the inclusion of  
962 young to old herbarium-type material (here, up to 74-years-old; up to 204 years in Brewer et  
963 al. 2019). This is particularly important in times of traveling restrictions and crucial for the  
964 correct application of taxon names in extremely morphologically diverse species complexes.

965         Here, we combined the advantages of three datasets to unravel evolutionary processes  
966 in polyploid complexes. We confirm previous approaches (e.g., Lo et al. 2010; Brandrud et al.  
967 2020) demonstrating that a combination of tree building, structure, and network analyses is  
968 most useful to reconstruct non-hierarchical relationships in these complexes. The sexual  
969 progenitor species often diversify in a rather tree-like bifurcating manner that can be  
970 recognized with tree-building supported by genetic structure and/or morphometric methods  
971 (Burgess et al. 2015; Wagner et al. 2019; Karbstein et al. 2020b).

972         In our study, we demonstrate that the RAD-Seq ML tree revealed a highly congruent  
973 topology compared with the target enrichment nuclear gene coalescent-based tree. These trees  
974 gave a first phylogenetic framework for the *R. auricomus* complex, as also shown in  
975 evolutionary young polyploid complexes of *Crataegus* (Lo et al. 2010) or *Dactylorhiza*  
976 (Brandrud et al. 2020). Here, the low interclade and extremely low intraclade (quartet)  
977 support values indicated the presence of reticulations and/or ILS. Nevertheless, allopolyploids  
978 originated by diverged progenitor species introduce errors in ordinary tree reconstructions due  
979 to network-like evolution and smushing of different evolutionary histories in consensus  
980 sequences (McDade 1992, Oxelman et al. 2017, Rothfels 2021). We regard this issue in our  
981 study as minor, since progenitors of polyploids are genetically less diverged (Karbstein et al.

982 2020b), tree and genetic structure analyses show comparable results, and subgenome  
983 dominance of allopolyploids was probably also expressed in consensus sequences used for  
984 tree analyses.

985         The applied approaches provide a phylogenetic framework for recognizing sexual  
986 progenitor species and thus for unraveling the origins of (allo)polyploids. The detection of  
987 incongruences between plastid trees and nuclear datasets is a strong signal for hybridization  
988 events already on the diploid level (McKain et al. 2018; Dauphin et al. 2018). In this study,  
989 incongruences delivered valuable information for both sexual progenitors and polyploid  
990 derivatives (see e.g., parental contribution of a probably already extinct species in H<sub>9</sub>).  
991 However, for the reconstruction of the reticulate relationships of allopolyploids, only genetic  
992 structure and network methods are able to unravel the correct evolutionary relationships.

993         Since neopolyploid complexes are evolutionary young and are characterized by  
994 reticulations and ILS, it is useful to employ genetic structure analyses that incorporate a  
995 maximum of allelic sequence diversity information. These analyses were previously often  
996 conducted with DNA fingerprinting markers (e.g., microsatellites, AFLPs). AFLP markers do  
997 not inform about heterozygosity, and in polyploids also microsatellites are usually scored as  
998 presence/absence, because allele dosages can often not be reliably assessed (e.g., Hodac et al.  
999 2018; Karbstein et al. 2019; Melicharkova et al. 2020). RADseq covers a magnitude of  
1000 markers, providing genome-wide sequence diversity per locus (SNPs) and thus robust results  
1001 for genetic structure. RADpainter+fineRADstructure incorporates all SNPs, and varying allele  
1002 numbers and amounts of missing data appropriate for young polyploid analyses (Malinsky et  
1003 al. 2018; Wagner et al. 2021). In addition, the employed sNMF algorithm based on unlinked  
1004 SNPs is not only faster, but also less sensitive to deviations from Hardy-Weinberg  
1005 equilibrium (HWE) than the popular STRUCTURE software; it tolerates missing data, and is

1006 also applicable to different ploidy levels (Frichot et al. 2014; Frichot and François 2020;  
1007 Karbstein et al. 2021).

1008         Whereas these methods impressively showed hybridity and a not yet recognized  
1009 species gene pool of apomicts, coalescent-based STACEY species delimitation based on  
1010 phased nuclear genes more clearly delimited the genetic structure of the polyploid complex  
1011 (Fig. 6a,b). Allele phasing was demonstrated and is particularly considered as crucial for  
1012 resolving young, reticulate relationships (Andermann et al. 2018; Eriksson et al. 2018;  
1013 Freyman et al. 2020; Rothfels 2021). Moreover, phylogenetic network analyses and  
1014 subsequent tests mainly based on phased nuclear genes (see also Tiley et al. 2021) best  
1015 unraveled subgenome contributions per polyploid and demonstrated predominant  
1016 allopolyploid origins. Performing several network methods across different datasets informed  
1017 by plastid information (i.e., consensus making) is the most important part of our study to get a  
1018 reliable picture about polyploid evolution in such a young complex. Nevertheless, in general,  
1019 potential limitations are the not realizable correct allele phasing of short RAD-Seq loci and  
1020 relatively low number of nuclear genes, which were compensated by the combination of both  
1021 datasets.

1022         Disentangling genetic markers (SNPs) of polyploids for post-origin processes informs  
1023 about divergence and stability of lineages. This information is crucial for classification and  
1024 delimitation of species (Grant 1981; Hörandl 2018). Although incorporating ten thousands of  
1025 RAD-Seq loci, our SNIploid analyses assigned only a minor fraction of RAD-Seq-SNPs to  
1026 homoeologous SNPs derived from hybrid origin. Here, a similar approach that incorporates  
1027 homeologs (from various ploidy levels) derived from phased nuclear genes would be more  
1028 favorable to assess polyploid (post-)origin evolution. A limitation of the SNIploid pipeline is  
1029 that the parental species must be defined for the input, only single samples can be analyzed,  
1030 and that the algorithm is so far limited to tetraploids (i.e., not applicable to higher or lower

1031 ploidy levels; see also Wagner et al. 2020). However, the congruence of our results in eight  
1032 independently analyzed hybrid lineages indicates two major trends in *R. auricomus*, namely  
1033 considerable segregation of the diploid hybrid generation combined with gene flow after  
1034 polyploidization, and so far only a low divergence via mutation in the more or less stable  
1035 lineages.

1036         Using the gained knowledge of this study, i.e., potential progenitor species of  
1037 (allo)polyploids, ploidy levels and reproduction modes, and allo- vs. autopolyploid origins,  
1038 subgenome assignments of allopolyploids and more appropriate phylogenetic allopolyploid  
1039 networks (e.g., Jones 2017a; Cao et al. 2019; Lautenschlager et al. 2020; Šlenker et al., 2021)  
1040 are applicable or should be optimized for the polyploid complex. The combination of datasets  
1041 and analytical pipelines gives a more comprehensive and complete picture of the evolution of  
1042 young polyploid complexes.

1043

1044 **Data availability.** The authors declare that basic data supporting the findings are available  
1045 within the manuscript and Supporting Information. RAD-Seq, target enrichment, and CP  
1046 alignments, and tables and figures supporting the results are deposited on FigShare  
1047 (<https://doi.org/10.6084/m9.figshare.14046305>). RAD-Seq reads are deposited on the  
1048 National Center for Biotechnology Information Sequence Read Archive (SRA): BioProject ID  
1049 PRJNA627796 <http://www.ncbi.nlm.nih.gov/bioproject/627796>). Flow cytometric (FC) and  
1050 flow cytometric seed screening (FCSS) data are also stored in Figshare  
1051 (<https://doi.org/10.6084/m9.figshare.13352429>).

1052

1053 **Code availability.** We deposited custom bash, R, and Julia scripts on Github  
1054 ([https://github.com/KK260/Ranunculus\\_auricomus\\_phylogenetic\\_network\\_scripts](https://github.com/KK260/Ranunculus_auricomus_phylogenetic_network_scripts)).

1055



1056 **Funding**

1057 The work was supported by the German Research Foundation (DFG, grant number  
1058 Ho4395/10-1 to E.H. within the priority program “Taxon-Omics: New Approaches for  
1059 Discovering and Naming Biodiversity” (SPP 1991).

1060

1061 **Acknowledgments**

1062 We acknowledge Franz G. Dunkel for providing garden plants and herbarium specimens, Ena  
1063 Lehtsaar and Julius Schmidt for technical help, and John Paul Bradican for suggestions on  
1064 previous manuscript versions. We thank the herbaria of Jena (JE), Munich (M), Oslo (O),  
1065 Uppsala (UPS), and the University of Vienna (WU) for loans of *R. auricomus* type species  
1066 material. We thank three referees and the editors for valuable comments on the manuscript.

1067

1068 **Literature Cited**

1069 *Dataset tags*

1070 Karbstein, K., Tomasello, S., Hodač, L., Lorberg, E., Daubert, M., & Hörandl, E. 2020. The  
1071 biodiversity of apomictic polyploid plants: the *Ranunculus auricomus* complex, National  
1072 Center for Biotechnology Information Sequence Read Archive (SRA) BioProject ID  
1073 PRJNA627796, <http://www.ncbi.nlm.nih.gov/bioproject/627796>.

1074 Karbstein, K., Tomasello, S., Hodač, L., Lorberg, E., Daubert, M., & Hörandl, E. 2021. The  
1075 biodiversity of apomictic polyploid plants: the *Ranunculus auricomus* complex - FC and  
1076 FCSS data, Figshare, <https://doi.org/10.6084/m9.figshare.13352429>.

1077 Karbstein, K., Tomasello, S., Hodač, L., Wagner, W., Marinček, P., Barke, B. H., Pätzold, C.,  
1078 & Hörandl, E. 2021. The biodiversity of apomictic polyploid plants: the *Ranunculus*  
1079 *auricomus* complex - RAD-Seq, TE, and CP (genomic) data, Figshare,  
1080 <https://doi.org/10.6084/m9.figshare.14046305>.

1081 Karbstein, K., Tomasello, S., Hodač, L., Wagner, W., Marinček, P., Barke, B. H., Pätzold, C.,  
1082 & Hörandl, E. 2021. *Ranunculus\_auricomus\_scripts\_phylogenetic\_networks\_sniploid*,  
1083 Github,  
1084 [https://github.com/KK260/Ranunculus\\_auricomus\\_phylogenetic\\_network\\_scripts](https://github.com/KK260/Ranunculus_auricomus_phylogenetic_network_scripts).

1085

1086 *References in the text*

1087 Abbott R., Albach D., Ansell S., Arntzen J.W., Baird S.J.E., Bierne N., Boughman J.,  
1088 Brelsford A., Buerkle C.A., Buggs R., Butlin R.K., Dieckmann U., Eroukhmanoff F.,  
1089 Grill A., Cahan S.H., Hermansen J.S., Hewitt G., Hudson A.G., Jiggins C., Jones J.,  
1090 Keller B., Marczewski T., Mallet J., Martinez-Rodriguez P., Möst M., Mullen S.,  
1091 Nichols R., Nolte A.W., Parisod C., Pfennig K., Rice A.M., Ritchie M.G., Seifert B.,

- 1092 Smadja C.M., Stelkens R., Szymura J.M., Väinölä R., Wolf J.B.W., Zinner D. 2013.  
1093 Hybridization and speciation. *J. Evol. Biol.* 26:229–246.
- 1094 Alger E.I., Edger P.P. 2020. One subgenome to rule them all: underlying mechanisms of  
1095 subgenome dominance. *Curr. Opin. Plant Biol.* 54:108–113.
- 1096 Andermann T., Fernandes A.M., Olsson U., Töpel M., Pfeil B., Oxelman B., Aleixo A.,  
1097 Faircloth B.C., Antonelli A. 2019. Allele phasing greatly improves the phylogenetic  
1098 utility of ultraconserved elements. *Syst. Biol.* 68:32–46.
- 1099 Asker S., Jerling L. 1992. Apomixis in plants. Boca Raton, CRC press.
- 1100 Babcock G.T., Stebbins G.L. 1938. The American species of *Crepis*. Their interrelationships  
1101 and distribution as affected by polyploidy and apomixis. Carnegie Inst. Washington 504.
- 1102 Baird N.A., Etter P.D., Atwood T.S., Currey M.C., Shiver A.L., Lewis Z.A., Selker E.U.,  
1103 Cresko W.A., Johnson E.A. 2008. Rapid SNP discovery and genetic mapping using  
1104 sequenced RAD markers. *PLoS One.* 3:1–7.
- 1105 Barke B.H., Daubert M., Hörandl E. 2018. Establishment of apomixis in diploid F<sub>2</sub> hybrids  
1106 and inheritance of apospory from F<sub>1</sub> to F<sub>2</sub> hybrids of the *Ranunculus auricomus*  
1107 complex. *Front. Plant Sci.* 9:1–12.
- 1108 Barke B.H., Karbstein K., Daubert M., Hörandl E. 2020. The relation of meiotic behaviour to  
1109 hybridity, polyploidy and apomixis in the *Ranunculus auricomus* complex  
1110 (Ranunculaceae). *BMC Plant Biol.* 20:523.
- 1111 Barker M.S., Arrigo N., Baniaga A.E., Li Z., Levin D.A. 2016. On the relative abundance of  
1112 autopolyploids and allopolyploids. *New Phytol.* 210: 391–398.
- 1113 te Beest M., Le Roux J.J., Richardson D.M., Brysting A.K., Suda J., Kubesoova M., Pysek P.  
1114 2012. The more the better? The role of polyploidy in facilitating plant invasions. *Ann.*

- 1115 Bot. 109:19–45.
- 1116 Bertrand Y.J., Scheen A.C., Marcussen T., Pfeil B.E., de Sousa F., Oxelman B. 2015.
- 1117 Assignment of homoeologs to parental genomes in allopolyploids for species tree
- 1118 inference, with an example from *Fumaria* (Papaveraceae). *Syst. Biol.* 64:448–471.
- 1119 Blischak P.D., Mabry M.E., Conant G.C., Pires J.C. 2018. Integrating networks,
- 1120 phylogenomics, and population genomics for the study of polyploidy. *Annu. Rev. Ecol.*
- 1121 *Evol. Syst.* 49:253–278.
- 1122 Bouckaert R., Heled J., Kühnert D., Vaughan T., Wu C.-H., Xie D., Suchard M.A., Rambaut
- 1123 A., Drummond A.J. 2014. BEAST 2: A software platform for Bayesian evolutionary
- 1124 analysis. *PLoS Comput. Biol.* 10:e1003537.
- 1125 Brandrud M.K., Baar J., Lorenzo M.T., Athanasiadis A., Bateman R.M., Chase M.W., Hedrén
- 1126 M., Paun O. 2020. Phylogenomic relationships of diploids and the origins of
- 1127 allotetraploids in *Dactylorhiza* (Orchidaceae). *Syst. Biol.* 69: 91–109.
- 1128 Brewer G.E., Clarkson J.J., Maurin O., Zuntini A.R., Barber V., Bellot S., Biggs N., Cowan
- 1129 R.S., Davies N.M.J., Dodsworth S., Edwards S.L., Eiserhardt. W.L., Epiawalage N.,
- 1130 Frisby S., Grall A., Kersey P.J., Pokorny L., Leitch I.J., Forest F., Baker W.J. 2019.
- 1131 Factors affecting targeted sequencing of 353 nuclear genes from herbarium specimens
- 1132 spanning the diversity of angiosperms. *Front. Plant Sci.* 10:1102.
- 1133 Brukhin V., Osadtchiy J.V., Florez-Rueda A.M., Smetanin D., Bakin E., Nobre M.S.,
- 1134 Grossniklaus U. 2019. The *Boechera* genus as a resource for apomixis research. *Front.*
- 1135 *Plant Sci.* 10:19.
- 1136 Burgess M.B., Cushman K.R., Doucette E.T., Frye C.T., Campbell C.S. 2015. Understanding
- 1137 diploid diversity: A first step in unraveling polyploid, apomictic complexity in
- 1138 *Amelanchier*. *Am. J. Bot.* 102:2041–2057.

- 1139 Cai R., Ané C. 2020. Assessing the fit of the multi-species network coalescent to multi-locus  
1140 data. *Bioinformatics* 37:634–641.
- 1141 Cao Z., Liu X., Ogilvie H. A., Yan Z., Nakhleh L. 2019. Practical aspects of phylogenetic  
1142 network analysis using Phylonet. *BioRxiv* 746362:1–39.
- 1143 Carter K.A., Liston A., Bassil N. V., Alice L.A., Bushakra J.M., Sutherland B.L., Mockler  
1144 T.C., Bryant D.W., Hummer K.E. 2019. Target capture sequencing unravels *Rubus*  
1145 evolution. *Front. Plant Sci.* 10:1–18.
- 1146 Clement M., Posada D., Crandall K.A. 2000. TCS: a computer program to estimate gene  
1147 genealogies. *Mol. Ecol.* 9:1657–1659.
- 1148 Comai L. 2005. The advantages and disadvantages of being polyploid. *Nat. Rev. Genet.*  
1149 6:836–846.
- 1150 Coyne J., Orr H. 2004. *Speciation*. Sunderland, Massachusetts, U.S.A., Sinauer Ass.
- 1151 Fehrer J, Slavikova R, Pastova L, Josefiova J, Mraz P, Chrtek J, Bertrand YJK. 2021.  
1152 Molecular evolution and organization of ribosomal DNA in the hawkweed tribe  
1153 Hieraciinae (Cichorieae, Asteraceae). *Front. Plant Sci.* 12:23.
- 1154 Darriba D., Posada D., Kozlov A.M., Stamatakis A., Morel B., Flouri T. 2020. ModelTest-  
1155 NG: a new and scalable tool for the selection of DNA and protein evolutionary models.  
1156 *Mol. Biol. Evol.* 37:291–294.
- 1157 Dauphin B., Grant J.R., Farrar D.R., Rothfels C.J. 2018. Rapid allopolyploid radiation of  
1158 moonwort ferns (*Botrychium*; Ophioglossaceae) revealed by PacBio sequencing of  
1159 homologous and homeologous nuclear regions. *Mol. Phylogenet. Evol.* 120:342–353.
- 1160 Davey J.W., Hohenlohe P.A., Etter P.D., Boone J.Q., Catchen J.M., Blaxter M.L. (2011).  
1161 Genome-wide genetic marker discovery and genotyping using next-generation

- 1162 sequencing. *Nat. Rev. Genet.* 12:499–510.
- 1163 Eaton D.A.R., Overcast I. 2020. ipyrad: interactive assembly and analysis of RAD-Seq  
1164 datasets. *Bioinformatics* 36: 2592–2594.
- 1165 Eaton D.A.R., Spriggs E.L., Park B., Donoghue M.J. 2017. Misconceptions on missing data  
1166 in RAD-seq phylogenetics with a deep-scale example from flowering plants. *Syst. Biol.*  
1167 66:399–412.
- 1168 Eriksson J.S., de Sousa F., Bertrand Y.J.K., Antonelli A., Oxelman B., Pfeil B.E. 2018. Allele  
1169 phasing is critical to revealing a shared allopolyploid origin of *Medicago arborea* and *M.*  
1170 *strasseri* (Fabaceae). *BMC Evol. Biol.* 18:9.
- 1171 Fér T., Schmickl R.E. 2018. HybPhyloMaker: target enrichment data analysis from raw reads  
1172 to species trees. *Evol. Bioinforma.* 14:1–9.
- 1173 Fellers JP. 2008. Genome filtering using methylation-sensitive restriction enzymes with six  
1174 base pair recognition sites. *Plant Genome*, 1:146-152.
- 1175 Flouri T., Jiao X., Rannala B., Yang Z. 2020. A Bayesian implementation of the multispecies  
1176 coalescent model with introgression for phylogenomic analysis. *Mol. Biol. Evol.*  
1177 37:1211–1223.
- 1178 Folk R.A., Mandel J.R., Freudenstein J. V. 2015. A protocol for targeted enrichment of  
1179 intron-containing sequence markers for recent radiations: a phylogenomic example from  
1180 *Heuchera* (Saxifragaceae). *Appl. Plant Sci.* 3:1500039.
- 1181 Fox D.T., Soltis D.E., Soltis P.S., Ashman T.L., Van de Peer Y. 2020. Polyploidy: a  
1182 biological force from cells to ecosystems. *Trends in Cell Biology* 30:688–694.
- 1183 Freyman W.A., Johnson M.G., Rothfels C.J. 2020. homologizer: Phylogenetic phasing of  
1184 gene copies into polyploid subgenomes. bioRxiv.

- 1185 Frichot E., François O. 2015. LEA: an R package for landscape and ecological association  
1186 studies. *Methods Ecol. Evol.* 6:925–929.
- 1187 Frichot E., François O. 2020. LEA: An R package for landscape and ecological association  
1188 studies. Retrieved from <https://bioconductor.org/packages/release/-bioc/html/LEA.html>
- 1189 Frichot E, Mathieu F, Trouillon T, Bouchard G, François O. 2014. Fast and efficient  
1190 estimation of individual ancestry coefficients. *Genetics* 196:973–983.
- 1191 Gordon S.P., Contreras-Moreira B., Levy J.J., Djamei A., Czedik-Eysenberg A., Tartaglio  
1192 V.S., Session A., Martin J., Cartwright A., Katz A., Singan V.R., Goltsman E., Barry K.,  
1193 Dinh-Thi V.H., Chalhoub B., Diaz-Perez A., Sancho R., Lusinska J., Wolny E., Nibau  
1194 C., Doonan J.H., Mur L.A.J., Plott C., Jenkins J., Hazen S.P., Lee S.J., Shu S., Goodstein  
1195 D., Rokhsar D., Schmutz J., Hasterok R., Catalan P., Vogel J.P. 2020. Gradual polyploid  
1196 genome evolution revealed by pan-genomic analysis of *Brachypodium hybridum* and its  
1197 diploid progenitors. *Nat. Commun.* 11:1–16.
- 1198 Gornall R.J. 1999. Population genetic structure in agamospermous plants. In: Hollingsworth  
1199 P.M., Bateman R.M., Gornall R.J., editors. *Molecular Systematics and Plant Evolution*.  
1200 London, UK: Taylor & Francis. p. 118–138.
- 1201 Grant V. 1981. *Plant speciation*. sec. ed. New York, Columbia University Press.
- 1202 Herrando-Moraira S., Calleja J.A., Carnicero P., Fujikawa K., Galbany-Casals M., Garcia-  
1203 Jacas N., Im H.-T., Kim S.-C., Liu J.-Q., López-Alvarado J., López-Pujol J., Mandel  
1204 J.R., Massó S., Mehregan I., Montes-Moreno N., Pyak E., Roquet C., Sáez L., Sennikov  
1205 A., Susanna A., Vilatersana R. 2018. Exploring data processing strategies in NGS target  
1206 enrichment to disentangle radiations in the tribe *Cardueae* (Compositae). *Mol.*  
1207 *Phylogenet. Evol.* 128:69–87.
- 1208 Hipp A.L., Eaton D.A.R., Cavender-Bares J., Fitzek E., Nipper R., Manos P.S. 2014. A

- 1209 framework phylogeny of the American oak clade based on sequenced RAD data. PLoS  
1210 One. 9.
- 1211 Hodač L., Barke B.H., Hörandl E. 2018. Mendelian segregation of leaf phenotypes in  
1212 experimental F<sub>2</sub> hybrids elucidates origin of morphological diversity of the apomictic  
1213 *Ranunculus auricomus* complex. *Taxon*. 67:1082–1092.
- 1214 Hodač L., Klatt S., Hojsgaard D., Sharbel T.F., Hörandl E. 2019. A little bit of sex prevents  
1215 mutation accumulation even in apomictic polyploid plants. *BMC Evol. Biol.* 19:170.
- 1216 Hodač L., Scheben A.P., Hojsgaard D., Paun O., Hörandl E. 2014. ITS polymorphisms shed  
1217 light on hybrid evolution in apomictic plants: a case study on the *Ranunculus auricomus*  
1218 complex. *PLoS One*. 9:28–30.
- 1219 Harrison N., Kidner C.A. 2011. Next-generation sequencing and systematics: What can a  
1220 billion base pairs of DNA sequence data do for you? *Taxon* 60:1552–1566.
- 1221 Hojsgaard D., Greilhuber J., Pellino M., Paun O., Sharbel T.F., Hörandl E. 2014. Emergence  
1222 of apospory and bypass of meiosis via apomixis after sexual hybridisation and  
1223 polyploidisation. *New Phytologist*, 204:1000–1012.
- 1224 Hojsgaard D., Hörandl E. 2019. The rise of apomixis in natural plant populations. *Front. Plant*  
1225 *Sci.* 10:358.
- 1226 Hörandl E. 2006. The complex causality of geographical parthenogenesis. *New Phytol.*  
1227 171:525–538.
- 1228 Hörandl E. 2018. The classification of asexual organisms: Old myths, new facts, and a novel  
1229 pluralistic approach. *Taxon*. 67:1066–1081.
- 1230 Hörandl E., Greilhuber J., Klímová K., Paun O., Temsch E., Emadzade K., Hodálová I. 2009.  
1231 Reticulate evolution and taxonomic concepts in the *Ranunculus auricomus* complex



- 1232 (Ranunculaceae): insights from analysis of morphological, karyological and molecular  
1233 data. *Taxon*. 58:1194–1215.
- 1234 Hörandl E., Greilhuber J. 2002. Diploid and autotetraploid sexuals and their relationships to  
1235 apomicts in the *Ranunculus cassubicus* group: insights from DNA content and isozyme  
1236 variation. *Plant Syst. Evol.* 234:85–100.
- 1237 Huang D.I., Hefer C.A., Kolosova N., Douglas C.J., Cronk Q.C.B. 2014. Whole plastome  
1238 sequencing reveals deep plastid divergence and cytonuclear discordance between closely  
1239 related balsam poplars, *Populus balsamifera* and *P. trichocarpa* (Salicaceae). *New*  
1240 *Phytol.* 204:693–703.
- 1241 Huson D.H., Bryant D. 2006. Application of phylogenetic networks in evolutionary studies.  
1242 *Mol. Biol. Evol.* 23:254–267.
- 1243 Jalas J, Suominen J. 1989. Atlas Florae Europaeae. Distribution of vascular plants in Europe,  
1244 vol. 8, Nymphaeaceae to Ranunculaceae. Helsinki, The Committee for Mapping the  
1245 Flora of Europe. Societas Biologica Fennica. Vanamo.
- 1246 Jaron K.S., Bast J., Nowell R.W., Ranallo-Benavidez T.R., Robinson-Rechavi M., Schwander  
1247 T. 2020. Genomic Features of Parthenogenetic Animals. *J. Hered.*:1–15.
- 1248 Johnson M.G., Pokorny L., Dodsworth S., Botigue L.R., Cowan R.S., Devault A., Eiserhardt  
1249 W.L., Epiawalage N., Forest F., Kim J.T, Leebens-Mack J.H., Leitch I. J., Maurin O.,  
1250 Soltis D.E., Soltis P.S., Wong G. K.-S., Baker W.J. 2019. A universal probe set for  
1251 targeted sequencing of 353 nuclear genes from any flowering plant designed using k-  
1252 medoids clustering. *Syst. Biol.* 68:594–606.
- 1253 Jones G. 2017a. Bayesian phylogenetic analysis for diploid and allotetraploid species  
1254 networks. *bioRxiv.*:1–15.

- 1255 Jones G. 2017b. Algorithmic improvements to species delimitation and phylogeny estimation  
1256 under the multispecies coalescent. *J. Math. Biol.* 74:447–467.
- 1257 Jones G., Aydin Z., Oxelman B. 2015. DISSECT: an assignment-free Bayesian discovery  
1258 method for species delimitation under the multispecies coalescent. *Bioinformatics.*  
1259 31:991–998.
- 1260 Kamneva O.K., Syring J., Liston A., Rosenberg N.A. 2017. Evaluating allopolyploid origins  
1261 in strawberries (*Fragaria*) using haplotypes generated from target capture sequencing.  
1262 *BMC Evol. Biol.* 17:180.
- 1263 Karbstein K., Rahmsdorf E., Tomasello S., Hodač L., Hörandl E. 2020a. Breeding system of  
1264 diploid sexuals within the *Ranunculus auricomus* complex and its role in a geographical  
1265 parthenogenesis scenario. *Ecol. Evol.* 10:14435–14450.
- 1266 Karbstein K., Tomasello S., Hodač L., Dunkel F.G., Daubert M., Hörandl E. 2020b.  
1267 Phylogenomics supported by geometric morphometrics reveals delimitation of sexual  
1268 species within the polyploid apomictic *Ranunculus auricomus* complex  
1269 (Ranunculaceae). *Taxon.* 69:1191–1220.
- 1270 Karbstein K., Tomasello S., Hodač L., Lorberg E., Daubert M., Hörandl E. 2021. Moving  
1271 beyond assumptions: polyploidy and environmental effects explain a geographical  
1272 parthenogenesis scenario in European plants. *Mol. Ecol. acc.*
- 1273 Karbstein K., Tomasello S., Prinz K. 2019. Desert-like badlands and surrounding (semi-)dry  
1274 grasslands of Central Germany promote small-scale phenotypic and genetic  
1275 differentiation in *Thymus praecox*. *Ecol. Evol.* 9:14066–14084.
- 1276 Kirschner J., Závěská Drábková L., Štěpánek J., Uhlemann I. 2015. Towards a better  
1277 understanding of the *Taraxacum* evolution (Compositae–Cichorieae) on the basis of  
1278 nrDNA of sexually reproducing species. *Plant Syst. Evol.* 301:1135–1156.

- 1279 Kozlov A.M., Darriba D., Flouri T., Morel B., Stamatakis A. 2019. RAxML-NG: a fast,  
1280 scalable and user-friendly tool for maximum likelihood phylogenetic inference.  
1281 *Bioinformatics*:1–3.
- 1282 Landis J.B., Soltis D.E., Zheng L., Marx H.E., Barker M.S., Tank D.C., Soltis P.S. 2018.  
1283 Impact of whole-genome duplication events on diversification rates in angiosperms. *Am.*  
1284 *J. Bot.* 105:348–363.
- 1285 Larsson A. 2014. AliView: a fast and lightweight alignment viewer and editor for large  
1286 datasets. *Bioinformatics* 30:3276–3278.
- 1287 Lautenschlager U., Wagner F., Oberprieler C. 2020. AllCoPol: Inferring allele co-ancestry in  
1288 polyploids. *BMC Bioinformatics.* 21:1–9.
- 1289 Leebens-Mack J.H., Barker M.S., Carpenter E.J., Deyholos M.K., Gitzendanner M.A.,  
1290 Graham S.W., Grosse I., Li Z., Melkonian M., Mirarab S., Porsch M., Quint M., Rensing  
1291 S.A., Soltis D.E., Soltis P.S., Stevenson D.W., Ullrich K.K., Wickett N.J., DeGironimo  
1292 L., Edger P.P., Jordon-Thaden I.E., Joya S., Liu T., Melkonian B., Miles N.W., Pokorny  
1293 L., Quigley C., Thomas P., Villarreal J.C., Augustin M.M., Barrett M.D., Baucom R.S.,  
1294 Beerling D.J., Benstein R.M., Biffin E., Brockington S.F., Burge D.O., Burris J.N.,  
1295 Burris K.P., Burtet-Sarramegna V., Caicedo A.L., Cannon S.B., Çebi Z., Chang Y.,  
1296 Chater C., Cheeseman J.M., Chen T., Clarke N.D., Clayton H., Covshoff S., Crandall-  
1297 Stotler B.J., Cross H., DePamphilis C.W., Der J.P., Determann R., Dickson R.C., Di  
1298 Stilio V.S., Ellis S., Fast E., Feja N., Field K.J., Filatov D.A., Finnegan P.M., Floyd S.K.,  
1299 Fogliani B., García N., Gâteblé G., Godden G.T., Goh F. (Qi Y., Greiner S., Harkess A.,  
1300 Heaney J.M., Helliwell K.E., Heyduk K., Hibberd J.M., Hodel R.G.J., Hollingsworth  
1301 P.M., Johnson M.T.J., Jost R., Joyce B., Kapralov M. V., Kazamia E., Kellogg E.A.,  
1302 Koch M.A., Von Konrat M., Könyves K., Kutchan T.M., Lam V., Larsson A., Leitch

- 1303 A.R., Lentz R., Li F.W., Lowe A.J., Ludwig M., Manos P.S., Mavrodiev E., McCormick  
1304 M.K., McKain M., McLellan T., McNeal J.R., Miller R.E., Nelson M.N., Peng Y., Ralph  
1305 P., Real D., Riggins C.W., Ruhsam M., Sage R.F., Sakai A.K., Scascitella M., Schilling  
1306 E.E., Schlösser E.M., Sederoff H., Servick S., Sessa E.B., Shaw A.J., Shaw S.W., Sigel  
1307 E.M., Skema C., Smith A.G., Smithson A., Stewart C.N., Stinchcombe J.R., Szövényi P.,  
1308 Tate J.A., Tiebel H., Trapnell D., Villegente M., Wang C.N., Weller S.G., Wenzel M.,  
1309 Weststrand S., Westwood J.H., Whigham D.F., Wu S., Wulff A.S., Yang Y., Zhu D.,  
1310 Zhuang C., Zuidof J., Chase M.W., Pires J.C., Rothfels C.J., Yu J., Chen C., Chen L.,  
1311 Cheng S., Li J., Li R., Li X., Lu H., Ou Y., Sun X., Tan X., Tang J., Tian Z., Wang F.,  
1312 Wang J., Wei X., Xu X., Yan Z., Yang F., Zhong X., Zhou F., Zhu Y., Zhang Y.,  
1313 Ayyampalayam S., Barkman T.J., Nguyen N. phuong, Matasci N., Nelson D.R., Sayyari  
1314 E., Wafula E.K., Walls R.L., Warnow T., An H., Arrigo N., Baniaga A.E., Galuska S.,  
1315 Jorgensen S.A., Kidder T.I., Kong H., Lu-Irving P., Marx H.E., Qi X., Reardon C.R.,  
1316 Sutherland B.L., Tiley G.P., Welles S.R., Yu R., Zhan S., Gramzow L., Theißen G.,  
1317 Wong G.K.S. 2019. One thousand plant transcriptomes and the phylogenomics of green  
1318 plants. *Nature*. 574:679–685.
- 1319 Lemoine F., Domelevo Entfellner J.-B., Wilkinson E., Correia D., Dávila Felipe M., De  
1320 Oliveira T., Gascuel O. 2018. Renewing Felsenstein’s phylogenetic bootstrap in the era  
1321 of big data. *Nature*. 556:452–456.
- 1322 Li H., Handsaker B., Wysoker A., Fennell T., Ruan J., & Homer N., Marth G., Abecasis G.,  
1323 Durbin R., 1000 Genome Project Data Processing Subgroup (2009). The sequence  
1324 alignment/map format and SAMtools. *Bioinformatics* 25: 2078–2079.
- 1325 Lo E.Y.Y., Stefanovic S., Dickinson T.A. 2010. Reconstructing reticulation history in a  
1326 phylogenetic framework and the potential of allopatric speciation driven by polyploidy  
1327 in an agamic complex in *Crataegus* (Rosaceae). *Evolution* 64:3593–3608.

- 1328 Mable B.K., Alexandrou M.A., Taylor M.I. 2011. Genome duplication in amphibians and  
1329 fish: An extended synthesis. *J. Zool.* 284:151–182.
- 1330 Malinsky M., Trucchi E., Lawson D.J., Falush D. 2018. RADpainter and fineRADstructure:  
1331 population inference from RAD-Seq data. *Mol. Biol. Evol.* 35:1284–1290.
- 1332 Marchant D.B., Soltis D.E., Soltis P.S. 2016. Patterns of abiotic niche shifts in allopolyploids  
1333 relative to their progenitors. *New Phytologist* 212:708–718.
- 1334 McBreen K., Lockhart P.J. 2006. Reconstructing reticulate evolutionary histories of plants.  
1335 *Trends Plant Sci.* 11:398–404.
- 1336 McDade L.A. 1992. Hybrids and phylogenetic systematics. 1. The impact of hybrids on  
1337 cladistic-analysis. *Evolution* 46:1329–1346.
- 1338 McDade, L.A. 1995. Hybridization and phylogenetics. In: Hoch P. C., Stephenson A. (eds.),  
1339 *Experimental and Molecular Approaches to Plant Biosystematics*. Missouri Botanical  
1340 Garden, St. Louis. pp. 305–331.
- 1341 McKain M.R., Johnson M.G., Uribe-Convers S., Eaton D., Yang Y. 2018. Practical  
1342 considerations for plant phylogenomics. *Applications in Plant Sciences* 6:15.
- 1343 Melicharkova A., Slenker M., Zozomova-Lihova J., Skokanova K., Singliarova B.,  
1344 Kacmarova T., Cabonova M., Kempa M., Sramkova G., Mandakova T., et al. 2020. So  
1345 closely related and yet so different: Strong contrasts between the evolutionary histories  
1346 of species of the *Cardamine pratensis* polyploid complex in Central Europe. *Front. Plant*  
1347 *Sci.* 11:1988.
- 1348 Meudt H.M., Albach D.C., Tanentzap A.J., Igea J., Newmarch S.C., Brandt A.J., Lee W.G.,  
1349 Tate J.A. 2021. Polyploidy on islands: Its emergence and importance for diversification.  
1350 *Front. Plant Sci.* 12: 637214.

- 1351 Mohammadin S., Wang W., Liu T., Moazzeni H., Ertugrul K., Uysal T., Christodoulou C.S.,  
1352 Edger P.P., Pires J.C., Wright S.I., Schranz M.E. 2018. Genome-wide nucleotide  
1353 diversity and associations with geography, ploidy level and glucosinolate profiles in  
1354 *Aethionema arabicum* (Brassicaceae). *Plant Syst. Evol.* 304:619–630.
- 1355 Mráz P., Filipaş L., Bărbos M.I., Kadlecová J., Pařtová L., Belyayev A., Fehrer J. 2019. An  
1356 unexpected new diploid *Hieracium* from Europe: Integrative taxonomic approach with a  
1357 phylogeny of diploid *Hieracium* taxa. *Taxon.* 68:1258–1277.
- 1358 Múrias Dos Santos A., Cabezas M.P., Tavares A.I., Xavier R., Branco M. 2016. TcsBU: a  
1359 tool to extend TCS network layout and visualization. *Bioinformatics.* 32:627–628.
- 1360 Nardi F.D., Dobes C., Muller D., Grasegger T., Myllynen T., Alonso-Marcos H., Tribsch A.  
1361 2018. Sexual intraspecific recombination but not de novo origin governs the genesis of  
1362 new apomictic genotypes in *Potentilla puberula* (Rosaceae). *Taxon* 67:1108–1131.
- 1363 Near T.J., MacGuigan D.J., Parker E., Struthers C.D., Jones C.D., Dornburg A. 2018.  
1364 Phylogenetic analysis of Antarctic notothenioids illuminates the utility of RAD-Seq for  
1365 resolving Cenozoic adaptive radiations. *Mol. Phylogent. Evol.* 129:268–279.
- 1366 Oberprieler C., Wagner F., Tomasello S., Konowalik K. 2017. A permutation approach for  
1367 inferring species networks from gene trees in polyploid complexes by minimising deep  
1368 coalescences. *Methods Ecol. Evol.* 8:835–849.
- 1369 Olave M., Meyer A. 2020. Implementing Large Genomic Single Nucleotide Polymorphism  
1370 Data Sets in Phylogenetic Network Reconstructions: A Case Study of Particularly Rapid  
1371 Radiations of Cichlid Fish. *Syst. Biol.* 69:848–862.
- 1372 Otto S.P., Whitton J. 2000. Polyploid incidence and evolution. *Annu. Rev. Genet.* 34:401–  
1373 437.

- 1374 Oxelman B., Brysting A.K., Jones G.R., Marcussen T., Oberprieler C., Pfeil B.E. (2017).  
1375 Phylogenetics of allopolyploids. *Annu. Rev. Ecol. Evol. Syst* 48:543–557.
- 1376 Paun O., Stuessy T.F., Hörandl E. 2006. The role of hybridization, polyploidization and  
1377 glaciation in the origin and evolution of the apomictic *Ranunculus cassubicus* complex.  
1378 *New Phytol.* 171:223–236.
- 1379 Paule J., Dunkel F.G., Schmidt M., Gregor T. 2018. Climatic differentiation in polyploid  
1380 apomictic *Ranunculus auricomus* complex in Europe. *BMC Ecol.* 18:16.
- 1381 Pease J.B., Brown J.W., Walker J.F., Hinchliff C.E., Smith S.A. 2018. Quartet Sampling  
1382 distinguishes lack of support from conflicting support in the green plant tree of life. *Am.*  
1383 *J. Bot.* 105:385–403.
- 1384 Philippe H., Forterre P. 1999. The rooting of the universal tree of life is not reliable. *J. Mol.*  
1385 *Evol.* 49:509–523.
- 1386 Van de Peer Y., Ashman T.-L., Soltis P.S., Soltis D.E. 2020. Polyploidy: an evolutionary and  
1387 ecological force in stressful times. *Plant Cell.*:1–16.
- 1388 Van De Peer Y., Mizrachi E., Marchal K. 2017. The evolutionary significance of polyploidy.  
1389 *Nat. Rev. Genet.* 18:411–424.
- 1390 Pellino M., Hojsgaard D., Schmutzer T., Scholz U., Hörandl E., Vogel H., Sharbel T.F. 2013.  
1391 Asexual genome evolution in the apomictic *Ranunculus auricomus* complex: examining  
1392 the effects of hybridization and mutation accumulation. *Mol. Ecol.* 22:5908–5921.
- 1393 Peralta M., Combes M., Cenci A., Lashermes P., Dereeper A. 2013. SNIploid: a utility to  
1394 exploit high-throughput SNP data derived from RNA-Seq in allopolyploid species. *Int. J.*  
1395 *Plant Genomics.* 2013:1–6.
- 1396 Qiu T., Liu Z., Liu B. 2020. The effects of hybridization and genome doubling in plant

- 1397 evolution via allopolyploidy. *Mol. Biol. Rep.* 47:5549–5558.
- 1398 R Core Team. 2020. R: a language and environment for statistical computing.
- 1399 Rambaut A., Drummond A.J., Xie D., Baele G., Suchard M.A. 2018. Posterior summarization  
1400 in Bayesian phylogenetics using Tracer 1.7. *Syst. Biol.* 67:901–904.
- 1401 Rannala B. 2015. The art and science of species delimitation. *Curr. Zool.* 61:846–853.
- 1402 Rannala B., Yang Z. 2003. Bayes estimation of species divergence times and ancestral  
1403 population sizes using DNA sequences from multiple loci. *Genetics* 164:1645–1656.
- 1404 Ree R.H., Hipp A.L. 2015. Inferring phylogenetic history from restriction site associated  
1405 DNA (RAD-Seq). In: Hörandl E., Appelhans M. (eds.) *Next-generation sequencing in*  
1406 *plant systematics*. Bratislava, IAPT, p. 181–204.
- 1407 Rice A., Smarda P., Novosolov M., Drori M., Glick L., Sabath N., Meiri S., Belmaker J.,  
1408 Mayrose I. 2019. The global biogeography of polyploid plants. *Nature Ecology &*  
1409 *Evolution* 3:265–273.
- 1410 Robinson J.T., Thorvaldsdóttir H., Winckler W., Guttman M., Lander E.S., Getz G., Mesirov  
1411 J.P. 2011. Integrative genomics viewer. *Nat. Biotechnol.* 29:24–26.
- 1412 Rothfels C.J. 2021. Polyploid phylogenetics. *New Phytol.*:nph.17105.
- 1413 Rothfels C.J., Pryer K., Li F.-W. 2017. Next-generation polyploid phylogenetics: rapid  
1414 resolution of hybrid polyploid complexes using PacBio single-molecule sequencing.  
1415 *New Phytologist* 213: 413–429.
- 1416 Sayyari E., Mirarab S. 2016. Fast coalescent-based computation of local branch support from  
1417 quartet frequencies. *Mol. Biol. Evol.* 33:1654–1668.
- 1418 Schmickl R., Liston A., Zeisek V., Oberlander K., Weitemier K., Straub S.C.K., Cronn R.C.,  
1419 Dreyer L.L., Suda J. 2016. Phylogenetic marker development for target enrichment from



- 1420 transcriptome and genome skim data: the pipeline and its application in southern African  
1421 *Oxalis* (Oxalidaceae). *Mol. Ecol. Resour.* 16:1124–1135.
- 1422 Schoenfelder K.P., Fox D.T. 2015. The expanding implications of polyploidy. *Journal of Cell*  
1423 *Biology* 209:485–491.
- 1424 Shen X.-X., Hittinger C.T., Rokas A. 2017. Contentious relationships in phylogenomic  
1425 studies can be driven by a handful of genes. *Nat. Ecol. Evol.* 1:0126.
- 1426 Šlenker M., Kantor A., Marhold K., Schmickl R., Mandáková T., Lysak M.A., Perný M.,  
1427 Caboňová M., Slovák M., Zozomová-Lihová J. 2021. Allele sorting as a novel approach  
1428 to resolving the origin of allotetraploids using Hyb-Seq data: A case study of the Balkan  
1429 mountain endemic *Cardamine barbaraeoides*. *Front. Plant Sci.* 12:659275.
- 1430 Sochor M., Vašut R.J., Sharbel T.F., Trávníček B. 2015. How just a few makes a lot:  
1431 Speciation via reticulation and apomixis on example of European brambles (*Rubus*  
1432 subgen. *Rubus*, Rosaceae). *Mol. Phylogenet. Evol.* 89:13–27.
- 1433 Solís-Lemus C., Bastide P., Ané C. 2017. PhyloNetworks: a package for phylogenetic  
1434 networks. *Mol. Biol. Evol.* 34:3292–3298.
- 1435 Soltis D.E., Gitzendanner M.A., Stull G., Chester M., Chanderbali A., Chamala S., Jordon-  
1436 Thaden I., Soltis P.S., Schnable P.S., Barbazuk W.B. 2013. The potential of genomics in  
1437 plant systematics. *Taxon* 62:886–898.
- 1438 Soltis P.S., Marchant D.B., Van de Peer Y., Soltis D.E. 2015. Polyploidy and genome  
1439 evolution in plants. *Curr. Opin. Genet. Dev.* 35:119–125.
- 1440 Soltis P.S., Soltis D.E. 2009. The role of hybridization in plant speciation. *Annu. Rev. Plant*  
1441 *Biol.* 60:561–588.
- 1442 Soltis P.S., Soltis D.E. 2016. Ancient WGD events as drivers of key innovations in

- 1443 angiosperms. *Curr. Opin. Plant Biol.* 30:159–165.
- 1444 Spoelhof J.P., Soltis P.S., Soltis D.E. 2017. Pure polyploidy: Closing the gaps in  
1445 autopolyploid research. *J. Syst. Evol.* 55:340–352.
- 1446 Stamatakis A. 2014. RAxML version 8: a tool for phylogenetic analysis and post-analysis of  
1447 large phylogenies. *Bioinformatics* 30:1312–1313.
- 1448 Struck T.H., Wey-Fabrizius A.R., Golombek A., Hering L., Weigert A., Bleidorn C., Klebow  
1449 S., Iakovenko N., Hausdorf B., Petersen M., Kück P., Herlyn H., Hankeln T. 2014.  
1450 Platyzoan paraphyly based on phylogenomic data supports a noncoelomate ancestry of  
1451 *Spiralia*. *Mol. Biol. Evol.* 31:1833–1849.
- 1452 Stull G.W., Soltis P.S., Soltis D.E., Gitzendanner M.A., Smith S.A. 2020. Nuclear  
1453 phylogenomic analyses of asterids conflict with plastome trees and support novel  
1454 relationships among major lineages. *Am. J. Bot.* 107:790–805.
- 1455 Than C., Ruths D., Nakhleh L. 2008. PhyloNet: a software package for analyzing and  
1456 reconstructing reticulate evolutionary relationships. *BMC Bioinformatics.* 9:322.
- 1457 Tiley G.P., Crowl A.A., Manos P.S., Sessa E.B., Solis-Lemus C., Yoder A.D., Burleigh J. G.  
1458 (2021). Phasing alleles improves network inference with allopolyploids. *bioRxiv*.
- 1459 Tomasello S., Karbstein K., Hodač L., Pätzold C., Hörandl E. 2020. Phylogenomics unravels  
1460 Quaternary vicariance and allopatric speciation patterns in temperate-montane plant  
1461 species: a case study on the *Ranunculus auricomus* species complex. *Mol. Ecol.*  
1462 29:2031–2049.
- 1463 Wagner F., Ott T., Zimmer C., Reichhart V., Vogt R., Oberprieler C. 2019. ‘At the crossroads  
1464 towards polyploidy’: genomic divergence and extent of homoploid hybridization are  
1465 drivers for the formation of the ox-eye daisy polyploid complex (*Leucanthemum*,

- 1466 Compositae-Anthemideae). *New Phytol.* 223:2039–2053.
- 1467 Wagner N.D., He L., Hörandl E. 2020. Phylogenomic relationships and evolution of  
1468 polyploid *Salix* species revealed by RAD sequencing data. *Front. Plant Sci.* 11:36–41.
- 1469 Wagner N.D., Clements M.A., Simpson L., Nargar K. 2021. Conservation in the face of  
1470 hybridisation: genome-wide study to evaluate taxonomic delimitation and conservation  
1471 status of a threatened orchid species. *Conserv. Genet.* 22:151–168.
- 1472 Weisrock D.W., Smith S.D., Chan L.M., Biebouw K., Kappeler P.M., Yoder A.D. 2012.  
1473 Concatenation and concordance in the reconstruction of mouse lemur phylogeny: An  
1474 empirical demonstration of the effect of allele sampling in phylogenetics. *Molec. Biol.*  
1475 *Evol.* 29: 1615–1630.
- 1476 Weitemier K., Straub S.C.K., Cronn R.C., Fishbein M., Schmickl R., McDonnell A., Liston  
1477 A. 2014. Hyb-Seq: combining target enrichment and genome skimming for plant  
1478 phylogenomics. *Appl. Plant Sci.* 2:1400042.
- 1479 Welch D.M., Meselson M. 2000. Evidence for the evolution of bdelloid rotifers without  
1480 sexual reproduction or genetic exchange. *Science* 288:1211–1215.
- 1481 Wen D., Yu Y., Zhu J., Nakhleh L. 2018. Inferring phylogenetic networks using PhyloNet.  
1482 *Syst. Biol.* 67:735–740.
- 1483 Wendel J.F. 2015. The wondrous cycles of polyploidy in plants. *Am. J. Bot.* 102:1753–1756.
- 1484 Wood T.E., Takebayashi N., Barker M.S., Mayrose I., Greenspoon P. B., Rieseberg L. H.  
1485 2009. The frequency of polyploid speciation in vascular plants. *Proc. Natl. Acad. Sci.*  
1486 USA 106:13875–13879.
- 1487 Yan Z., Cao Z., Liu Y., Nakhleh L. 2020. Maximum parsimony inference of phylogenetic  
1488 networks in the presence of polyploid complexes. bioRxiv.

- 1489 Zhang C., Rabiee M., Sayyari E., Mirarab S. 2018. ASTRAL-III: polynomial time species  
1490 tree reconstruction from partially resolved gene trees. BMC Bioinformatics. 19:153.
- 1491
- 1492

1493 **Figure Legends**

1494 **Fig. 1.** Evolutionary processes in young polyploid species complexes and methods to address  
1495 these processes (a) Evolution of an apomictic polyploid complex from two sexual progenitor  
1496 species and evolution of lineages after origin (redrawn and modified after Babcock and  
1497 Stebbins 1938; see also Grant 1981 and Coyne and Orr 2004 for modern interpretations). (b)  
1498 description of respective evolutionary processes and the corresponding analytical methods  
1499 and pipelines applied here; CP = chloroplast (plastid) regions, RAD-Seq = RAD-Seq loci,  
1500 TEG = target enriched nuclear genes. For a detailed scheme of bioinformatic pipelines see  
1501 Fig. 3.

1502 **Fig. 2.** Locations of studied *R. auricomus* populations across Europe. We investigated 235  
1503 sexual and apomictic populations (see Supplementary Table S1 for details). Symbols  
1504 represent reproduction modes of populations (colored circles = sexuals, defined as  
1505 subgenomes here for further data analyses), dark grey triangles = obligate or facultative  
1506 apomictic, also in Karbstein et al. (2020b, 2021). Circles of sexual species were highlighted  
1507 according to the color scheme of Fig. 4. The solid line shows the range margin of the  
1508 *R. auricomus* complex, and the pointed lines highlight the distribution of sexual species. The  
1509 original map was downloaded from <https://d-maps.com/>, created by Karbstein et al. (2021),  
1510 and modified for this study.

1511 **Fig. 3.** Bioinformatic pipeline to resolve polyploid species complexes. Here, we used  
1512 *R. auricomus* as a model system and basically followed the concept of Hörandl (2018) to  
1513 disentangle complicated species complexes. We analyzed (2) sexual species and apomictic  
1514 taxa together, using a priori information about (1a) sexual species (Karbstein et al. 2020b) and  
1515 (1b) ploidy levels and reproduction modes (Karbstein et al. 2020b, 2021). Analyses are based  
1516 on the optimized alignments of three different datasets covering genomic parts (RAD-Seq),  
1517 exomic nuclear regions (target enrichment, TEG), and plastome regions (chloroplast, CP). We  
1518 used RAD-Seq datasets to calculate maximum likelihood (ML) trees, genetic structure  
1519 analyses, distance-based networks, maximum pseudolikelihood networks, and SNP discovery  
1520 analyses. To study the robustness of RAD-Seq results, we computed coalescent-based trees,  
1521 species delimitation analysis, and maximum pseudolikelihood networks based on target  
1522 enrichment datasets. A ML tree, and distance-based and haplotype networks of the CP dataset  
1523 were also included to get further details about hybridogenic origins of polyploids.

1524 **Fig. 4.** Phylogenetic trees based on RAD-Seq and target enrichment data. (a) a ML tree based  
1525 on RAxML-NG results and a min10 RAD-Seq alignment (280 samples, 97,312 loci, 438,775  
1526 SNPs) and (b) a coalescent-based tree based on ASTRAL results and a target enrichment  
1527 alignment (113 samples, 576 non-phased genes). For Fig. 4a, FBP, TBE, and quartet sampling  
1528 scores (QC/QD/QI; see Supplementary Fig. S3a-d and legend for explanations) are displayed  
1529 per branch. Nodes are colored according to QC values (legend on the left). For Fig. 4b, FBP  
1530 and quartet support scores ( $MT=Q_1/Q_2/Q_3$ ) values are shown per branch. In general, only  
1531 supported main clades (I-V, FBP/TBE>70; except Fig. 4b split between *R. notabilis* s.l. and  
1532 *R. marsicus*) are illustrated because of mostly low/no BT support (BT<70) within clades.  
1533 Each clade contains a sexual species and several polyploids. Number of polyploid taxa is  
1534 given per main clade. We calculated sample composition between RAD-Seq and target  
1535 enrichment clades (only shared samples were evaluated due to different sample sizes), and  
1536 illustrated values in the central part of the figure (0%=main clades are composed of  
1537 completely different samples, 100%=main clades are composed of completely equal samples).  
1538 Dotted lines show differences between clades of both datasets. See Supplementary Figs. S1,  
1539 S2, S4a-c and Figshare data repository for more details. Squared brackets: A part of the  
1540 branch was cut for illustrative purposes.



1541 **Fig. 5.** Phylogenetic tree and genetic structure based on plastome (CP) data. (a) ML tree  
1542 (RAxML-NG) based on 87 samples and 71 plastid regions of the plastome (CP) dataset. Only  
1543 main clades containing sexual species are shown (coloring according to Fig. 4). Concerning  
1544 the clade in grey, plastid types of asexual polyploids were not found in any of the sexual  
1545 species suggesting the former existence of a nowadays extinct sexual progenitor species. FBP  
1546 values are given for each branch and clade (I-IV). (b) Neighbor-net analysis (SplitsTree)  
1547 based on genetic distances (general time reversible [GTR] model with estimated site  
1548 frequencies and ML), 87 samples, and 71 plastid regions of the plastome (CP) dataset. We  
1549 colored main splits according to Fig. 4a. See Supplementary Fig. S5, S6 for more details.  
1550 Squared brackets: A part of the branch was cut for illustrative purposes.

1551 **Fig. 6.** Genetic structure analyses based on RAD-Seq and target enrichment data. (a)  
1552 Clustered fineRADstructure coancestry matrix of 280 sexual and polyploid apomictic  
1553 individuals of the *R. auricomus* complex based on the ‘min10’ RAD-Seq alignment (97,312  
1554 loci, 438,775 SNPs). The legend on the right shows the color-coding of genetic similarity  
1555 (coancestry values): the darker the square, the higher the similarity between a pair of  
1556 individuals. (b) Similarity matrix of STACEY species delimitation analyses of 113  
1557 individuals based on a phased target enrichment alignment (48 genes). Posterior probabilities  
1558 for belonging to the same cluster (species) are shown for pairs of individuals in the legend on  
1559 the right: black is for 1.0 posterior probability and white for 0.0. See Fig. 4b, Supplementary  
1560 Figs. S4a-c, S10 and high resolution figures on Figshare for clustering structure (a) tree with  
1561 posterior probability group assignment probabilities and (b) coalescent-based tree. We  
1562 indicated supported genetic clusters with solid lines, shared similarity among (sub)clusters  
1563 with dotted lines, and sexual species with broad dashed colored squares (subgenomes C, F, M,  
1564 N, and E). Small black squares (‘H<sub>n</sub>’) indicate selected tetraploid apomicts, which were  
1565 investigated for allo- vs autopolyploid origin (10 polyploids; a small square indicates the  
1566 analyzed individual; see IDs in Supplementary Table S1). Using lines and colored  
1567 circles/ellipses, we highlighted the potential parental subgenome contributions for each  
1568 polyploid (P<sub>1</sub>, P<sub>2</sub>, ... and P<sub>n</sub> with n=the n-th parental subgenome contribution. P<sub>1</sub> is always the  
1569 parental subgenome contribution with the highest coancestry score/posterior probability  
1570 (likeliest) followed by other parental/subgenome contributions with decreasing coancestry  
1571 scores/posterior probabilities (minor parental/subgenome contributions not drawn, see  
1572 Supplementary Table S2 for more details).

1573 **Fig. 7.** Geographic maps showing genetic clusters and ancestry coefficients across Europe. (a,  
1574 c) interpolated values of ancestry coefficients (method ‘max’, i.e., at each point the cluster for  
1575 which the ancestry coefficient is maximal) and (b, d) location-wise admixture estimate pie  
1576 charts using K=3 and 4 genetic clusters. Results are based on sNMF results of 280 sexual and  
1577 apomictic *R. auricomus* individuals and the ‘min30’ unlinked-SNP RAD-Seq alignment  
1578 (33,165 loci). See Supplementary Figs. S6-11, S15, and figures on Figshare. In (a) and (c),  
1579 colored circles represent sexual species (coloring according to Fig. 4): blue=*R. cassubicifolius*  
1580 s.l. (C), turquoise=*R. flabellifolius* (F), red=*R. marsicus* (M), green=*R. envalirensis* s.l. (E),  
1581 and orange=*R. notabilis* s.l (N). We adopted the coloring also to pie charts in (b) and (d).  
1582 Europe map source: <https://maps.ngdc.noaa.gov>.

1583 **Fig. 8.** Reconstructed phylogenetic networks based on RAD-Seq, target enrichment, and CP  
1584 data. (a-h, left) Final networks of allopolyploids are based on genetic structure and  
1585 phylogenetic network results (consensus results) corrected by the by the full likelihood  
1586 approach+AIC calculations in Phylonet and CP data. P<sub>1</sub> defines the largest subgenome  
1587 contribution, followed by P<sub>2</sub> and P<sub>3</sub>. The network topology follows the published rooted  
1588 phylogeny of *R. auricomus* sexuals (without tetraploid *R. marsicus*; Karbstein et al. 2020b).  
1589 Curves indicate subgenome contributions (P<sub>1</sub>-P<sub>3</sub>). (a-h, right) Bar charts based on SNIploid  
1590 results are shown. Bar charts show SNP origins in percents (cat 1=SNPs identical to  
1591 DIPLOID2, cat 2=SNPs identical to DIPLOID1/reference, cat 3/4=derived SNPs,  
1592 cat 5=homeo-SNPs. We highlighted SNPs percent concerning all SNPs (see Material and  
1593 Methods for additional evaluation of SNP category ‘others’) with additional black T-bars.  
1594 Concerning H<sub>5</sub> and H<sub>8</sub>, we calculated two SNIploid analyses because three parents have  
1595 contributed to its origin. Coloring of sexual progenitor subgenomes is according to Fig. 4.  
1596 Subgenomes of C=*R. cassubicifolius* s.l., F=*R. flabellifolius*, E=*R. envalirensis* s.l., and  
1597 N=*R. notabilis* s.l.

1598 **Fig. 9.** Hybrid scheme of sexual progenitors and selected polyploid *R. auricomus* derivatives.  
1599 The diploid sexual progenitor species *R. cassubicifolius* s.l. (C), *R. flabellifolius* (F),  
1600 *R. notabilis* s.l. (N), *R. envalirensis* s.l. (E), and a hypothetical unknown one (U) in different  
1601 combinations gave rise to asexual polyploid derivatives (same polyploid individuals as in Fig.  
1602 8). Per allopolyploid, curves to the left and right indicate parental subgenome contributions.  
1603 Subgenome dominance is shown by the relative position of the polyploid to the progenitors,  
1604 for example '*R. x elatior*' is closer to subgenome C due to C subgenome dominance). We also  
1605 illustrate characteristic basal leaf types of taxa during anthesis (variation not covered, two  
1606 types illustrated for *R. flabellifolius* due to the frequent occurrence of undivided and divided  
1607 types; source: herbarium type specimens). The hybrid scheme is based on phylogenetic  
1608 network and genetic structure results of RAD-Seq and target enrichment datasets supported  
1609 by CP data (Table 1).

1610 **Table 1.** Genetic Structure and Phylogenetic Network results of tested tetraploid *R. auricomus* accessions (H<sub>1</sub>-H<sub>10</sub>). Each row (H<sub>1</sub>-H<sub>10</sub>) represents  
1611 a separately analyzed individual. Results are based on RAD-Seq (RADpainter+fineRADstructure, PhyloNetworks) and phased nuclear target  
1612 enrichment gene (STACEY, PhyloNetworks, Phylonet) datasets. Consensus results summarize all previously gained information. Final results  
1613 indicate final subgenome contribution(s), i.e., consensus results corrected by the full likelihood approach+AIC calculations in Phylonet  
1614 (likel+AIC, AIC = Akaike Information Criterion; more than one result if AIC network difference was less than 10 units) and plastome analysis  
1615 results (CP type; C/F= plastid type shared by the diploid sexual species *R. cassubicifolius* and *R. flabellifolius*, \*=not the same sample between  
1616 CP and network analyses, #=haplotype from an unknown/extinct sexual progenitor species of Central Europe). Concerning the final results of H<sub>9</sub>,  
1617 we classified P<sub>1</sub> as “E(U)” because of the *R. envalirensis*-like U plastid type (see above). According to final results, we classified genome  
1618 evolution of investigated polyploids (allo=allopolyploid, auto=autopolyploid), and the number of involved subgenomes in polyploid formation.  
1619 See also Figs. 5, 6, 8, Supplementary Tables S1, S7, and data on Figshare for sample IDs, genetic structure, and network results.

1620

1621

1622

1623

1624

1625
